## 1 SARS-CoV-2 variants in the making: Sequential intrahost evolution and forward 2 transmissions in the context of persistent infections

3 Ana S. Gonzalez-Reiche<sup>1</sup>, Hala Alshammary<sup>2,4</sup>, Sarah Schaefer<sup>3</sup>, Gopi Patel<sup>3</sup>, Jose Polanco<sup>2,4</sup>, Juan  
4 Manuel Carreño<sup>2,4</sup>, Angela A. Amoako<sup>2,4</sup>, Aria Rooker<sup>2,4</sup>, Christian Cognigni<sup>2,4</sup>, Daniel Floda<sup>1</sup>,  
5 Adriana van de Guchte<sup>1</sup>, Zain Khalil<sup>1</sup>, Keith Farrugia<sup>1</sup>, Nima Assad<sup>5</sup>, Jian Zhang<sup>1</sup>, Bremy  
6 Albuquerque<sup>1,5</sup>, PARIS/PSP study group<sup>2,4</sup>, Levy Sominsky<sup>2,4</sup>, Charles Gleason<sup>2,4</sup>, Komal  
7 Srivastava<sup>2,4</sup>, Robert Sebra<sup>1,8,9,10</sup>, Juan David Ramirez<sup>6,11</sup>, Radhika Banu<sup>6</sup>, Paras Shrestha<sup>6</sup>, Florian  
8 Krammer<sup>2,4,6</sup>, Alberto Paniz-Mondolfi<sup>6</sup>, Emilia Mia Sordillo<sup>6 †</sup>, Viviana Simon<sup>2,3,4,6,7, †</sup>, Harm van  
9 Bakel<sup>1,8, †</sup>

- 10 1. Department of Genetics and Genomic Sciences, Icahn School of Medicine at Mount Sinai,  
11 New York, NY 10029, USA  
12 2. Department of Microbiology, Icahn School of Medicine at Mount Sinai, New York, NY 10029,  
13 USA  
14 3. Division of Infectious Diseases, Department of Medicine, Icahn School of Medicine at Mount  
15 Sinai, New York, NY 10029, USA  
16 4. Center for Vaccine Research and Pandemic Preparedness (C-VARPP), Icahn School of  
17 Medicine at Mount Sinai, New York, NY, USA  
18 5. Graduate School of Biomedical Sciences, Icahn School of Medicine at Mount Sinai, New  
19 York, NY 10029, USA  
20 6. Department of Pathology, Molecular, and Cell-Based Medicine, Icahn School of Medicine at  
21 Mount Sinai, New York, NY 10029, USA  
22 7. The Global Health and Emerging Pathogens Institute, Icahn School of Medicine at Mount  
23 Sinai, New York, NY 10029, USA  
24 8. Icahn Genomics Institute, Icahn School of Medicine at Mount Sinai, New York, NY 10029,  
25 USA  
26 9. Black Family Stem Cell Institute, Icahn School of Medicine at Mount Sinai, New York, NY,  
27 10029, USA  
28 10. Sema4, a Mount Sinai venture, Stamford CT, 06902  
29 11. Centro de Investigaciones en Microbiología y Biotecnología-UR (CIMBIUR), Facultad de  
30 Ciencias Naturales, Universidad del Rosario, Bogotá, Colombia.

### 31 Corresponding authors/senior authors:

32 † Dr. Emilia Mia Sordillo (Emilia.Sordillo@mountsinai.org), Dr. Viviana Simon  
33 (viviana.simon@mssm.edu), and Dr. Harm van Bakel (harm.vanbakel@mssm.edu)  
34

### 35 PARIS/PSP study group:

36 Giulio Kleiner, Dalles Andre, Katherine F Beach, Maria C Bermúdez-González, Gianna Cai, Neko  
37 Lyttle, Lubbertus C F Mulder, Annika Oostenink, Ashley Beathrese T Salimbangon, Gagandeep  
38 Singh, Morgan van Kesteren, Brian Monahan, Jake Mauldin, Mahmoud Awawda  
39

40 **ABSTRACT – 193 WORDS**

41 Persistent severe acute respiratory syndrome coronavirus 2 (SARS-CoV-2) infections have  
42 been reported in immune-compromised individuals and people undergoing immune-modulatory  
43 treatments. Although intrahost evolution has been documented, to our knowledge, no direct  
44 evidence of subsequent transmission and stepwise adaptation is available.

45 Here we describe sequential persistent SARS-CoV-2 infections in three individuals that led  
46 to the emergence, forward transmission, and continued evolution of a new Omicron sublineage,  
47 BA.1.23, over an eight-month period. The initially transmitted BA.1.23 variant encoded seven  
48 additional amino acid substitutions within the spike protein (E96D, R346T, L455W, K458M,  
49 A484V, H681R, A688V), and displayed substantial resistance to neutralization by sera from  
50 boosted and/or Omicron BA.1-infected study participants. Subsequent continued BA.1.23  
51 replication resulted in additional substitutions in the spike protein (S254F, N448S, F456L, M458K,  
52 F981L, S982L) as well as in five other virus proteins.

53 Our findings demonstrate that the Omicron BA.1 lineage can diverge further from its  
54 already exceptionally mutated genome during persistent infection in more than one host, and also  
55 document ongoing transmission of these novel variants. There is an urgent need to implement  
56 strategies to prevent prolonged SARS-CoV-2 replication and to limit the spread of newly  
57 emerging, neutralization-resistant variants in vulnerable patients.

58

## 59 INTRODUCTION

60 The genomic landscape of severe acute respiratory syndrome coronavirus 2 (SARS-CoV-  
61 2) has been shaped by the emergence of antigenically diverse variants of concern (VOC)<sup>1</sup>. These  
62 viral variants carry mutations that render them more transmissible, more fusogenic, and/or permit  
63 escape not only from infection but also vaccine-induced immunity<sup>2-4</sup>. Some variants such as the  
64 Omicron VOCs, which swept the globe starting November 2021, also display partial or complete  
65 resistance to therapeutic or prophylactic monoclonal treatments<sup>5</sup>. Over the past ten months  
66 Omicron sublineages with increasing numbers of mutations in spike have continued to emerge  
67 (e.g., BA.1, BA.2, BA.4/5), posing great challenges to the containment of SARS-CoV-2 spread  
68 and providing the rationale for formulation of bivalent SARS-CoV-2 booster vaccines that include  
69 an Omicron BA.1 or BA.5 spike in addition to the ancestral spike.

70 Most patients with coronavirus disease 2019 (COVID-19) clear the virus upon resolution  
71 of the acute infection. However, ongoing SARS-CoV-2 replication has been documented in a  
72 subset of immunocompromised individuals. In these chronically infected cases, recovery of  
73 infectious virus over several months and stepwise acquisition of mutations in spike has been  
74 observed, pointing to positive selection<sup>6-13</sup>. It has been speculated that prolonged intrahost viral  
75 evolution played a role in the emergence of several SARS-CoV-2 VOCs such as Alpha and  
76 Omicron<sup>14,15</sup>, but clear evidence for forward transmissions of mutated variants from chronic  
77 infection cases has been lacking.

78 We describe herein a primary case of persistent SARS-CoV-2 Omicron BA.1 infection  
79 marked by intrahost evolution of a variant (Omicron BA.1.23) encoding seven additional amino  
80 acid substitutions in the already antigenically distinct Omicron BA.1 spike protein, and that  
81 resulted in at least five further cases of Omicron BA.1.23 infection. Persistent infections  
82 documented in two of these cases (one lasting four weeks, the other more than four months) were  
83 associated with continued BA.1.23 evolution and acquisition of additional mutations within and  
84 outside of spike. Although the variants that evolved in the persistently infected cases during the  
85 cumulative eight-month period reveal unique constellations of mutations in each, they also  
86 strongly point to convergent viral evolution with other co-circulating SARS-CoV-2 lineages.  
87 Notably, most amino acid changes occurred at positions known to confer either immune escape<sup>16,17</sup>  
88 or altered viral fusogenicity<sup>18-20</sup>. Some of these escape mutations in BA.1.23 are now signature

89 substitutions in emerging Omicron lineages such as BA.2.75.2, indicating that persistent viral  
90 replication in the context of suboptimal immune responses is an important driver of SARS-CoV-  
91 2 diversification.

## 92 RESULTS

### 93 Emergence of a novel BA.1 sublineage through intrahost evolution.

94 We performed genomic analysis of serially collected nasopharyngeal (NP) and anterior nares (AN)  
95 samples from an immunocompromised patient (P1) with diffuse B-cell lymphoma and persistent  
96 SARS-CoV-2 Omicron BA.1 replication between December 2021 and March 2022. Over a 12-  
97 week period, we documented the accumulation of nine amino acid substitutions in the spike protein  
98 N-terminal domain (NTD), the receptor binding domain (RBD), and in the S1/S2 furin cleavage  
99 site (FCS) (**Fig. 1**) within the same patient. The first four mutations R346T, K458M, E484V, and  
100 A688V were detected simultaneously 40 days after the initial SARS-CoV-2 diagnosis and were  
101 fixed. Two weeks later (day 64), L167T and the FCS mutation P681Y were detected in addition  
102 to the four initial mutations. During the following weeks (day 72 and day 81), two different viral  
103 populations emerged each carrying shared (L455W) as well as additional distinct signature  
104 mutations (E96D on day 72, S477D on day 81). All but one of the mutations observed in the  
105 consensus sequences outside the spike gene were non-synonymous, providing further support for  
106 positive intrahost selection of spike protein changes with competitive replication advantages.

107

### 108 Forward spread confirms transmission potential of the novel BA.1.23 sublineage.

109 Background health system-wide SARS-CoV-2 genomic surveillance conducted by the Mount  
110 Sinai Pathogen Surveillance Program (MS-PSP) during the same time period identified three other  
111 patients harboring SARS-CoV-2 Omicron variants that shared seven of the amino acid  
112 substitutions found in the index case P1 (E96D, R346T, L455W, K458M, A484V, H681R,  
113 A688V), and were consistent with multiple forward transmissions based on the timeline of  
114 infection (**Fig. 2, Table 1**). Although viral isolation failed for specimens available from the index  
115 case, we successfully cultured SARS-CoV-2 from the initial positive specimens of the subsequent  
116 cases, confirming the transmission of replication-competent virus. All three forward transmissions  
117 were detected in patients with underlying hematologic malignancies.

118 Lastly, two additional related SARS-CoV-2 genomes from the NYC area were identified from the  
119 GISAID (Global Initiative on Sharing Avian Influenza Data) database (**Fig. 2**). Based on the  
120 metadata provided, these two cases differed by age and gender from our cases, consistent with  
121 independent but limited community spread of this new Omicron BA.1 sub-variant. All

122 transmission cases contained one synonymous change in Orf1a (T6001C) previously only  
123 observed at day 72 in the index case (**Extended Data Fig. 1**), narrowing the time window of the  
124 first transmission to a few weeks following day 64. As of August 2022, the most recent case was  
125 detected in mid-April 2022 and the last SARS-CoV-2 positive specimen from a forward  
126 transmission case (P3) was collected in September 2022. Taken together, the presence of a unique  
127 combination of mutations in all six cases is indicative of forward transmission of this novel  
128 Omicron subvariant, which received the BA.1.23 Pango lineage designation.

129

### 130 **Sequential persistent infections drive further intrahost evolution of BA.1.23**

131 While patient P2 cleared the BA.1.23 infection, patients P3 and P4 both developed persistent  
132 infections (**Fig. 2 and 3A**). The MS-PSP continued monitoring these patients during follow-up  
133 visits and hospitalizations. Patient P4 remained positive by nucleic acid amplification tests  
134 (NAAT) for four weeks, with acquisition of an additional mutation in the spike RBD (S:V445A)  
135 within one week of the initial positive test (**Fig. 2 and 3A**). Patient P3 developed a much longer  
136 persistent infection lasting for more than four months. Genomic analysis of all 10 serially collected  
137 specimens from P3 identified 14 additional amino acid substitutions throughout the viral genome  
138 (**Fig. 2B and Extended Data Fig. 1**). The most recent specimen collected 131 days after P3's  
139 COVID-19 onset contained 11 additional amino acid substitutions compared to the originally  
140 transmitted BA.1.23 variant. These included six substitutions in the spike NTD (S254F), RBD  
141 (N448S, F456L, reversion of 458M to K), and S2 (reversion of 981L to F, S982L); as well as five  
142 substitutions in other SARS-CoV-2 proteins (ORF1a\_nsp3: T1001/183I, K1795/977Q,  
143 ORF1ab\_nsp11 S4398/6L; ORF1ab\_nsp12: G5063/671S; and ORF7a: T39I/T24I). Notably, two  
144 spike amino acid reversions to the WA1/USA (S:M458K) or BA.1 (S:F981L) state were  
145 accompanied by changes at neighboring positions (S:F456L and S:S982L) (**Fig. 2B and Extended**  
146 **Data Fig. 1**).

147 We further identified multiple positions with intra-host single nucleotide variants that were present  
148 in only a minority of the SARS-CoV-2 viral populations, hereafter referred to as minor single  
149 nucleotide variants (mSNVs), within each of the three persistent infection cases (P1, P3, and P4).  
150 In some cases, we detected mSNVs within or outside the spike gene in earlier specimens, prior to  
151 their fixation in subsequent specimens from the same patient (**Figure 2B and Extended Data**

152 **Figure 1,2**). We also observed numerous positions with mSNVs that persisted across multiple  
153 sequential specimens without becoming dominant. This was most notable for patient P3: between  
154 the first specimen collected on day 101 and the ninth specimen collected on day 218, the number  
155 of positions with mSNVs at a level >10% in two or more specimens increased gradually from 0 to  
156 19 – eventually outnumbering the consensus sequence changes by a factor of three (**Fig. 2B and**  
157 **Extended Data Fig. 3**). Approximately half of these mutations occurred within the spike gene,  
158 where nonsynonymous mSNVs were clustered in the S1 (NTD:S254F, RBD:K356T, S371F,  
159 P384L, F456L, K458M, and FCS:N679K) and S2 (D936Y,V963F, N978D, L981F, S982L,  
160 E1195G) domains (**Fig. B2 and Extended Data Fig. 4**). Mutations at these positions are rare at  
161 the consensus level, with a maximum prevalence of 0.1% in the GISAID reference database [as of  
162 2022-09-10]. The final specimen collected two weeks later, on day 232, showed eleven additional  
163 substitutions (including five at positions with prior mSNVs) and two positions with mSNVs (**Fig.**  
164 **2B, Extended Data Fig. 3 and Supplementary Table S1**). The progressive accumulation of  
165 mutations as well as the low prevalence of the specific substitutions in co-circulating SARS-CoV-  
166 2 lineages in NYC at the time, makes it unlikely that the mutated genotypes are the result of  
167 recombination with other viral variants. The large shift in mutational profile may reflect a fitness  
168 advantage of the dominant variant in this specimen. Thus, intra-host adaptation occurs with  
169 different dynamics pointing to bottlenecks and competing selection pressures resulting in the  
170 appearance and disappearance of specific mutations.

171

## 172 **Impact of treatment and host immunity on BA.1.23 evolution**

173 To determine the potential impact of SARS-CoV-2 antiviral treatments on intrahost evolution we  
174 examined the medication histories of patients P1 (index), P2, P3 and P4 (**Fig. 3**). We also assessed  
175 SARS-CoV-2 spike binding antibody levels using available serological data from clinical tests.  
176 The index patient P1 was vaccinated at the time of admission with two doses of an unspecified  
177 vaccine administered six months and one week before hospitalization. A third vaccine dose was  
178 administered two days after admission. Additional SARS-CoV-2 antiviral treatments included a  
179 course of remdesivir on days 1-6 and a dose of Gamunex IgG on day 9 (**Fig. 3D**). Moderate titers  
180 of SARS-CoV-2 antibodies were detected on day 38, around the time the first intra-host mutations  
181 were found (**Fig. 2C**). These titers could be due to residual antibodies from the Gamunex IgG

182 treatment, an immune response to vaccination and/or infection, or a combination of treatment and  
183 host response. Notably, the detection of the first three spike mutations followed an increase in  
184 NAAT cycle thresholds (Ct) on day 30, suggesting a potential selection bottleneck around this  
185 time (**Fig. 2A**).

186 Patient P2 was fully vaccinated and had high titers of SARS-CoV-2 antibodies when assayed three  
187 months before and one month after their single positive SARS-CoV-2 NAAT (**Fig. 3B**). This  
188 patient also received a one-month course of nirmatrelvir/ritonavir (Paxlovid™) (**Fig. 3D**). The  
189 combination of high levels of host antibodies and antiviral treatment likely explains why this  
190 patient did not develop a persistent infection.

191 The long-term case P3 was fully vaccinated at the time of their first positive test and received a 3-  
192 week course of nirmatrelvir/ritonavir (Paxlovid™). However, no SARS-CoV-2 antibodies were  
193 detected in serological assays performed during the first 4 months of their persistent infection (**Fig.**  
194 **3B**). Notably, during this time we also did not detect new substitutions in the BA.1.23 lineage,  
195 despite indications of active viral replication based on consistently low NAAT Ct values (less than  
196 25) in NP and AN samples. Active replication was confirmed by isolation of replication-competent  
197 SARS-CoV-2 from five specimens collected between study days 101–147. Notably, the  
198 appearance of new intra-host substitutions during the last month of persistent infection occurred  
199 around the time of detection of SARS-CoV-2 antibodies at levels close to the lower limit of the  
200 serological assay (**Fig. 3**). P3 did not receive antibody therapy during their hospitalization,  
201 indicating that the seroconversion was the result of a delayed and weak host immune response.

202 Patient P4 was unvaccinated and received bebtelovimab mAb after their first positive SARS-CoV-  
203 2 PCR test, followed by a course of nirmatrelvir/ritonavir. P4 had low SARS-CoV-2 antibody titers  
204 at the time of the first positive PCR prior to the mAb treatment (**Fig. 3B**). The S:V445A mutation  
205 that emerged in this patient may be associated with the mAb treatment, as it was shown to result  
206 in a 111-fold reduction in susceptibility to bebtelovimab for viral variants carrying this mutation  
207 in pseudotyped virus-like particle (VLP) neutralization assays<sup>21</sup>. We did not find SARS-CoV-2  
208 mutations associated with remdesivir<sup>22-27</sup> or nirmatrelvir/ritonavir resistance<sup>28</sup> in any of the  
209 patients treated with these drugs.

210

211 **Serum neutralization profile of Omicron BA.1.23**



212 Neutralization of Omicron BA.1 isolates by sera from convalescent or twice boosted individuals  
213 is strongly reduced compared to the levels obtained for neutralization of the ancestral strains<sup>29-31</sup>.  
214 We therefore assessed the degree of neutralizing activity of BA.1.23 (BA.1 + S:E96D, R346T,  
215 L455W, K548M, E484V, P681R, A688V) compared to Omicron BA1 (B.1.1.529), and the  
216 ancestral SARS-CoV-2 (USA-WA1/2020, WA). We used a multi-cycle replication assay in which  
217 serum is present continuously to best mimic physiological *in vivo* conditions. We selected sera  
218 from two subsets of PARIS study participants representing distinct levels of immunity. The first  
219 panel of sera tested was collected before and after booster vaccination while the second set of  
220 samples was obtained before and after Omicron BA.1 breakthrough infection.

221 Prior to booster vaccination with monovalent SARS-CoV-2 RNA-based vaccines, neutralization  
222 of BA.1, BA.1.23 and the WA1/USA were comparable (geometric mean titer; GMT WA1: 31;  
223 GMT BA.1: 12; GMT BA.1.23: 9; **Fig. 4A**). However, 4/9 and 6/9 samples failed to display any  
224 neutralization activity against BA.1 and BA.1.23 respectively while this was true for only 2/9  
225 samples when looking at activity against the ancestral virus. After booster vaccination, the loss in  
226 neutralization for BA.1.23 was greater than 15-fold compared to only a three-fold reduction for  
227 BA.1 relative to WA1/USA (geometric mean titer; GMT WA1: 674; BA.1:234; GMT BA.1.23:  
228 45; **Fig. 4A**). Of note, the loss of neutralization activity for BA.1 measured here is less than what  
229 has previously been reported which could be due to assay variation in combination with the limited  
230 number of samples tested<sup>29</sup>.

231 We next looked how sera collected before and after breakthrough infection would neutralize  
232 BA.1.23. We noted a significant difference in neutralization activity for BA.1.23 but not BA.1  
233 compared to WA1 in the samples collected before and after BA.1 breakthrough infection (**Fig.**  
234 **4B**). Prior to BA.1 infection, the difference was >25-fold with 3/11 samples having undetectable  
235 neutralization activity for BA.1.23 and 5-fold difference for BA.1 (GMT WA1: 406; GMT BA.1:  
236 83; GMT BA.1.23: 16; **Fig. 4B**). After infection, neutralization titers increased for all three viruses  
237 reducing the difference to two-fold for BA.1 and 8-fold for BA.1.23 (GMT WA1: 2134; GMT  
238 BA.1: 1026; GMT BA.1.23: 253; **Fig. 4B**).

239 Lastly, we analyzed sera collected from patient P2 at different time points (e.g., before booster  
240 vaccination, after booster vaccination but before BA.1.23 infection, and at two time points after  
241 infection with BA.1.23). P2 mounted neutralizing antibodies after booster vaccination with the

242 ancestral variant being neutralized >25 times more efficiently than BA.1 or BA.1.23 (**Fig. 4C**).  
243 One month after breakthrough infection with BA.1.23, neutralization of all three viruses increased  
244 relative to the titers measured after booster vaccination but to very different degrees (e.g. WA1: 6-  
245 fold, BA.1:45 fold, BA.1.23: 25-fold). Of note, two months after infection, the BA.1 titers  
246 remained stable, while neutralization of the ancestral virus as well as BA.1.23 declined equally.  
247 Collectively these results indicate that BA.1.23 is significantly more resistant to neutralization than  
248 the parental BA.1 variant.  
249

## 250 DISCUSSION

251 It has been speculated that the emergence of antigenically diverse SARS-CoV-2 variants such as  
252 Omicron result from intrahost viral evolution driven initially by suboptimal immune responses and  
253 then spread by forward transmissions. Our data demonstrate that intrahost evolution of SARS-  
254 CoV-2 during persistent infection in immunocompromised individuals can drive the emergence  
255 and spread of novel (sub)variants with extensive mutations in key antigenic regions, even in the  
256 context of the already highly mutated Omicron lineage. Further sequential evolution in  
257 transmission cases shows that rapid divergence can occur stepwise and persist in small numbers  
258 of individuals, complicating early detection of novel variants.

259 The most extensive changes in the evolution of the BA.1.23 lineage were seen during its  
260 emergence in patient P1 and its subsequent divergence in patient P3 over a total period of 8 months.  
261 Based on available clinical testing data, both patients were initially negative for SARS-CoV-2  
262 antibodies but seroconverted to moderate to low levels around the time spike mutations were  
263 accumulating. These conditions are likely optimal for the selection of immune escape mutations  
264 and provide an explanation for the clustering of BA.1.23-specific changes in the spike protein. It  
265 is important to note that the antiviral treatments administered over limited time periods as  
266 monotherapies (e.g., monoclonal antibodies, remdesivir, and nirmatrelvir/ritonavir (Paxlovid™)  
267 failed to eliminate the persistent infection, highlighting the need for improved or potential  
268 combination therapy tailored for these special situations.

269 During the initial emergence of the BA.1.23 lineage in index patient P1 mutations were  
270 concentrated in the spike protein. The amino acid substitutions or positions at which changes  
271 accumulated have been associated with neutralization escape (e.g., R346T, E484V, S477)<sup>16,17</sup>,  
272 increased angiotensin converting enzyme 2 (ACE2) binding avidity (e.g., R346T, L455W)<sup>32</sup>,  
273 improved viral fusogenicity (e.g., P681R/Y)<sup>18</sup>, or a predicted increase in fitness (e.g., positions  
274 346, 484 and 681)<sup>33</sup>. Subsequent stepwise changes in patient P3 occurred more broadly throughout  
275 the SARS-CoV-2 genome. The RBD mutations N448S and F456L present in the most recent  
276 specimen from P3 are within the ACE2 binding region with potential for changes in binding  
277 affinity and antibody escape<sup>32</sup>. Mutations outside the spike mapped to nonstructural proteins, many  
278 of which have previously been detected in other VOCs such as Nsp3\_T183I (Alpha),

279 Nsp3\_K977Q (Gamma), Nsp12\_G671S (Delta AY.\* and Omicron BA.2.75). Although the effects  
280 of these mutations have not been characterized, they occurred in the virus polymerase subunit  
281 (Nsp12) and in proteins with antagonistic activity towards the host's innate immunity (Nsp3,  
282 ORF6, ORF7a, ORF9b)<sup>34</sup>.

283 Consistent with the extensive changes in the spike protein, resistance of the transmitted BA.1.23  
284 variant to neutralization was substantially increased compared to the ancestral SARS-CoV-2 strain  
285 as well as to BA.1 Omicron. This was true both for sera collected before and after monovalent  
286 booster vaccination as well as after BA.1 breakthrough infection (**Figure 4**). Escape from  
287 neutralization was likely mediated by the combination of R346T, L455W, K458M, and E/A484V  
288 within the receptor binding region of spike. Of note, substitutions at position R346 are found in  
289 several Omicron sublineages (e.g., BA.4, BA.5) and subvariants (e.g., BA.2.72.2, BA.4.6/BF.7  
290 (R346T), BA.4.7 (R346S), and BA.5.9 (R346I))<sup>35</sup>. These variants were not circulating at the time  
291 of BA.1.23 emergence pointing to convergent evolution in the context of suboptimal immune  
292 responses.

293 We further found that changes in minority viral populations can greatly increase the spectrum of  
294 mutations during persistent infection beyond what is observed at the consensus level. Viral 'quasi-  
295 species' have been described for pandemic coronaviruses such as SARS-CoV-1, Middle Eastern  
296 Respiratory Syndrome Coronavirus (MERS-CoV) and SARS-CoV-2<sup>36-42</sup>, but their role remains to  
297 be fully elucidated<sup>43</sup>. Interestingly, mSNVs predominantly occurred in conserved regions and  
298 remained present in multiple sequential specimens. Only a small subset of these mutations became  
299 dominant in later specimens. We speculate that these viral populations enable sub-optimal  
300 mutations to persist within the host, increasing the likelihood for the emergence of compensatory  
301 mutations that offset their fitness defects.

302 Despite careful monitoring, we did not encounter new BA.1.23 cases in our routine SARS-CoV-2  
303 surveillance or in the GISAID database between June-September 2022, suggesting that the lineage  
304 has not spread further beyond the initial outbreak. This may be due to increased caution by  
305 immunocompromised patients to avoid contacts that could increase their risk of infection. We also  
306 note that patients P1, P3 and P4 were hospitalized for long stretches of time during their persistent  
307 infections, further limiting community exposure. Finally, the limited transmission could reflect a  
308 reduced fitness of BA.1.23 compared to contemporary lineages. Notable in this respect is that the

309 emergence of the BA.1.23 lineage coincided with the general displacement of BA.1 by BA.2  
310 sublineages in the NYC area, in particular BA.2.12.1, which dominated SARS-CoV-2 cases during  
311 the spring and early summer of 2022. A longer observation period with continued background  
312 surveillance will be needed to rapidly identify any potential re-emergence of BA.1.23 in patients  
313 other than the ones included in this study.

314 Our findings add to the accumulating knowledge regarding SARS-CoV-2 persistent infections,  
315 and document subsequent forward transmissions. Furthermore, we show that persistent infections  
316 can drive emergence of viral variants with the potential to spread to other individuals, some of  
317 whom may themselves develop prolonged infections, and thereby establish a pathway for  
318 continued virus evolution. This warrants genomic monitoring of persistent infections in particular,  
319 and further underscores the need to limit the duration of viral infection. Improved early detection  
320 of novel SARS-CoV-2 variants and forward transmission tracking, a better understanding of the  
321 selection processes driving SARS-CoV-2 evolution and the role of mSNVs, as well as therapies  
322 that limit virus persistence and shedding, are essential to reduce the emergence of highly mutated  
323 viral variants in the future.

324

325 **MATERIALS AND METHODS**

326 *Molecular SARS-CoV-2 diagnostics*

327 SARS-CoV-2 molecular diagnostic testing was performed in the Molecular Microbiology  
328 Laboratories of the MSHS Clinical Laboratory by nucleic acid amplification tests (NAAT) that  
329 have been validated for nasopharyngeal (NP), anterior nares (AN) swabs, and saliva specimens.  
330 All but one positive sample included in this study were tested using the PerkinElmer® New  
331 Coronavirus Nucleic Acid Detection Kit which provides qualitative detection of nucleic acid from  
332 SARS-CoV-2. It includes two SARS-CoV-2 targets (ORF1ab, N) and one internal positive control  
333 (IC; bacteriophage MS2). Cycle threshold (Ct) values are generated for all three targets and  
334 provide a quantitative estimate of the viral load. The only other positive sample that was run on  
335 another testing platform was the first specimen of the index case (P1). It was tested as a point of  
336 care test (POC) using the cobas® Liat® System (cobas® SARS-CoV-2 & Influenza A/B) assay, and  
337 the biospecimen was discarded prior to transfer to the MS-PSP.

338

339 *The Mount Sinai Pathogen Surveillance Program (MS-PSP)*

340 The Mount Sinai Pathogen Surveillance Program (MS-PSP) has profiled the evolving landscape  
341 of SARS-CoV-2 in New York City (NYC) since the beginning of the pandemic<sup>44,45</sup>. We routinely  
342 perform complete viral genome sequencing of randomly selected contemporaneous SARS-CoV-2  
343 positive specimens collected from patients seeking care at our health system. Residual respiratory  
344 specimens (NP, AN swabs) were collected after completion of the diagnostic process, as part of  
345 the Mount Sinai Pathogen Surveillance Program. The program was reviewed and approved by the  
346 Mount Sinai Hospital (MSH) Institutional Review Board (IRB-13-00981). The detailed  
347 investigation into persistent SARS-CoV-2 infections in patients receiving care at the Mount Sinai  
348 Health System was separately reviewed and approved by the MSH IRB (IRB-22-00760).

349

350 *Human Serum Samples*

351 We used a panel of sera collected as part of the longitudinal observational PARIS (Protection  
352 Associated with Rapid Immunity to SARS-CoV-2) cohort<sup>46</sup>. This study follows health care  
353 workers longitudinally since April 2020. Samples were selected based on the study participants

354 different levels of immunity (before and after booster vaccination, as well as before and after  
355 Omicron BA.1 infection). The study was reviewed and approved by the MSH IRB (IRB-20-  
356 03374). All participants signed written consent forms prior to sample and data collection and  
357 provided permission for sample banking and sharing. Sera collected before and after SARS-CoV-  
358 2 booster vaccination (N=9 participants, 18 sera) as well as before and after Omicron BA.1 break-  
359 through infections (N=11 participants, 22 sera) were selected for testing in this study (see  
360 **Supplementary Table S3** for infection, vaccine and demographics information).

361 In addition, patient P2 participated in another of our observational study (IRB-16-01215). They  
362 provided written consent prior to biospecimen and data collection. Several serum samples from  
363 this patient before and after BA.1.23 infection were available for neutralization assays.

364 The 44 sera (40 PARIS, 4 from P2) from our observational cohorts are unique to this study and  
365 are not publicly available.

366

#### 367 RNA extraction and SARS-CoV-2 genome sequencing

368 RNA was extracted using the Chemagic™ Viral DNA/RNA 300 Kit H96 (PerkinElmer, CMG-  
369 1033-S) on the automated Chemagic™ 360 instrument (PerkinElmer, 2024-0020) from 300uL of  
370 viral transport media per the manufacturer's protocol. cDNA synthesis followed by whole genome  
371 amplification with two custom primer panel sets targeting 1.5 and 2kb regions across the SARS-  
372 CoV-2 genome was performed as previously described<sup>44</sup> with the addition of new oligonucleotides  
373 to minimize amplicon dropout for Omicron lineages derived from PANGO lineage B.1.1.529  
374 (**Supplementary Table S4**). Paired-end (2x150bp) Nextera XT (Illumina, cat. FC-131-1096)  
375 libraries prepared from amplicons were sequenced on a MiSeq instrument. SARS-CoV-2 genomes  
376 were assembled using a custom reference-based pipeline as previously described<sup>44</sup>. The final  
377 average sequencing depth per genome ranged between ~135k to ~415k reads.

378

#### 379 Analysis of minor nucleotide variants

380 Minority intra-host single nucleotide variants (mSNVs) were annotated when present in both reads  
381 of paired-end reads of a single sample and at a minimum frequency of 0.1 (10%). A second quality  
382 control filter was applied by only including positions for which mSNVs were present in more than

383 one sample from the study (from different time points) or for positions that changed at the  
384 consensus level at any point of the investigation.

385

### 386 Phylogenetic analysis

387 Global background SARS-CoV-2 sequences were downloaded from the GISAID EpiCoV  
388 database (as of 2022-08-30). The GISAID database was queried for the novel mutations observed  
389 in P1-P4 sequences to identify their closest matches. Sequence hits were confirmed by their Mash  
390 distance<sup>47</sup>. For this, a genome sketch was generated with Mash v.2.3 from the sanitized alignment  
391 of the global sequences filtered for lineages BA.1.\* as produced by Nextstrain<sup>1,48</sup> v11 for SARS-  
392 CoV-2 with default parameters (<https://github.com/nextstrain/ncov>). This allowed pairwise  
393 comparisons of our data with high-quality global sequences with available metadata. Maximum  
394 likelihood phylogenetic inferences of the MS-PSP SARS-CoV-2 genomes, including the closest  
395 sequence matches and all other BA.\* lineage sequences from the MS-PSP surveillance program,  
396 were done using an Omicron BA.\* and New York State-focused background with proximity  
397 subsampling scheme with Nextstrain under the GTR+G model of nucleotide substitution. Branch  
398 support was assessed with the ultrafast bootstrap method with 1000 replicates in IQ-TREE  
399 multicore version 2.1.2 [PMID: 29077904, 25371430]. Clade and lineage assignments were done  
400 with Nextclade CLI v3.2 (2021-11-04)<sup>49</sup> and with PANGO-v1.8 (pangolin v3.1.17, pangoLEARN  
401 v.2022-04-22)<sup>50,51</sup>.

402

### 403 SARS-CoV-2 viral cultures

404 Replication-competent SARS-CoV-2 was obtained as previously described<sup>29</sup>. Briefly, Vero-E6  
405 cells expressing transmembrane serine protease 2 (TMPRSS2) (BPS Biosciences, catalog (cat.)  
406 no. 78081) were cultured in Dulbecco's modified Eagle medium containing 10% heat-inactivated  
407 fetal bovine serum and 1% minimum essential medium (MEM) Amino Acids Solution,  
408 supplemented with 100 U/ml penicillin, 100 µg/ml streptomycin, 100 µg/ml normocin, and 3 µg/ml  
409 puromycin. 200ul of viral transport media from the nasopharyngeal or anterior nares swab  
410 specimen was added to Vero-E6-TMPRSS2 cells in culture media supplemented with 2% heat-  
411 inactivated fetal bovine serum, 100g/ml normocin, and 0.5 µg/ml amphotericin B. Cultures were



412 maintained for a maximum of 10 days. Culture supernatants were collected and clarified by  
413 centrifugation (3,739g for 5 min) upon the appearance of cytopathic effects. Viral cultures were  
414 successful for the initial specimens obtained from P2, P3, and P4, but failed for all P1 specimens.

415

#### 416 Titration and concentration of viral isolates

417 Viral stocks were sequence-verified and then titered using the 50% tissue culture infectious dose  
418 (TCID<sub>50</sub>) method on Vero-E6-TMPRSS2 cells. Based on sequencing verification, viral isolate  
419 from P3 (PV56567) was selected for further experiments. Since the initial viral titer of the  
420 expanded BA.1. 23 PV56567 viral stock was too low ( $4 \times 10^2$  TCID<sub>50</sub>/ml) to perform  
421 microneutralization assays, we concentrated the viral isolate 4x using Pierce™ Protein  
422 Concentrator PES, 100K MWCO (Thermo Scientific, Catalog number: 88537) columns as  
423 described by the manufacturer. Briefly, culture supernatant was collected upon appearance of a  
424 cytopathic effect (CPE), clarified by centrifugation (3,739g, 5min) and then concentrated. Titers  
425 after concentration were  $1.27 \times 10^5$  TCID<sub>50</sub>/ml.

426

#### 427 Micro-neutralization assays with replication-competent SARS-CoV-2 isolates

428 Sera collected from three different groups of study participants were used to assess the  
429 neutralization of wild type (WA1), BA.1, and BA.1.23 SARS-CoV-2 isolates. The first panel of  
430 samples includes sera collected before and after mRNA SARS-CoV-2 booster vaccination (N: 9,  
431 PARIS cohort), the second panel includes sera collected before and after BA.1 Omicron break-  
432 through infection (N:11, PARIS cohort). The last series includes longitudinal samples from P2,  
433 the first of the forward transmission case, collected prior as well as after the infection with  
434 BA.1.23.

435 Sera from study participants were serially diluted (three-fold) from a starting dilution of 1:10 using  
436 infection media consisting of minimum essential media (MEM, Gibco) supplemented with 2 mM  
437 L-glutamine, 0.1% sodium bicarbonate (w/v, Gibco), 10 mM 4-(2-hydroxyethyl)-1-  
438 piperazineethanesulfonic acid (HEPES, Gibco), 100 U/ml penicillin, 100 µg/ml streptomycin  
439 (Gibco) and 0.2% bovine serum albumin (MP Biomedicals). Diluted sera were incubated for one  
440 hour with 10,000 TCID<sub>50</sub> of the three different viruses at room temperature. After the incubation,

441 120 µl of the serum-virus mix were transferred to Vero-E6-TMPRSS2 (plated in 96 well plates the  
442 prior day) and incubated at 37°C, 5% CO<sub>2</sub> for one hour. The serum-virus mix was removed and  
443 100 µl/well of the diluted sera were added in addition to 100 µl/well of MEM 2% FBS. The plates  
444 were incubated for 48 hours at 37°C incubation. The cells were fixed (200 µl/well, 10%  
445 formaldehyde solution) overnight at 4°C prior to staining an anti-SARS nucleoprotein antibody  
446 produced in house (mAb 1C7C7)<sup>52</sup>. All procedures above were performed in the Biosafety Level  
447 3 (BSL-3) facility at the Icahn School of Medicine at Mount Sinai following approved standard  
448 safety guidelines. The nucleoprotein staining was performed as previously described<sup>29</sup>. The  
449 analyses were performed using Prism 9 software (GraphPad).

450

#### 451 Statistics

452 Statistical analyses were performed using Prism 9 software (GraphPad). A one-way ANOVA with  
453 Tukey's multiple comparisons test was used to compare the neutralization titers for the three  
454 viruses.

455 **ACKNOWLEDGMENTS**

456 We thank the Mount Sinai Hospital and School Leadership, in particular Dr. David Reich, Dr.  
457 Dennis Charney, and Dr. Carlos Cordon-Cardo, for their ongoing support of the MS-PSP  
458 throughout the pandemic. We thank the laboratory technologists and staff in the Molecular  
459 Microbiology Laboratories and the Rapid Response Laboratories of the Mount Sinai Health  
460 System since without their assistance and help, none of this surveillance work would be possible.

461 We gratefully acknowledge the authors and originating and submitting laboratories of sequences  
462 from GISAID's EpiCoV ([www.gisaid.org](http://www.gisaid.org)) that were used as background for our phylogenetic  
463 inferences.

464

465 **FUNDING SOURCES**

466 The work reported was, in part, supported by a contract from the *National Institute of Allergy and*  
467 *Infectious Diseases* (75N93021C00014, Option 12A) awarded to the *Center for Research on*  
468 *Influenza Pathogenesis and Transmission* and by an Option to the Collaborative Influenza Vaccine  
469 Innovation Centers (CIVIC) contract 75N93019C00051 as part of the *SARS-CoV-2 Assessment of*  
470 *Viral Evolution (SAVE) Program*, a contract from the *National Institute of Allergy and Infectious*  
471 *Diseases* (HHSN272201400008C, Option 20) awarded to the *Center for Research on Influenza*  
472 *Pathogenesis*, and awards (S10OD026880 and S10OD030463) from the *NIH Office of Research*  
473 *Infrastructure Programs*. The Mount Sinai Pathogen Surveillance Program is supported in part by  
474 Institutional funds from the Icahn School of Medicine as well as the Mount Sinai Hospital.

475

476 **AUTHOR CONTRIBUTION STATEMENT**

477 Conceptualization: A.S.G.-R., H.A., E.M.S., V.S., H.v.B. Sample acquisition: S.S, G.P, J.P., A.A.,  
478 A.R., C.C., D.F., L.S., C.G., K.S., J.D.R., R.B., P.S, A.P-M, PSP-PARIS Study Group. Sequencing  
479 and genome assembly: A.vd.G, K.F., Z.K., J.Z., B.A., R.S. Methodology: A.S.G.-R., H.A., N.A.,  
480 J.M.C, F.K. Investigation: A.S.G.-R., H.A., J.M.C., E.M.S., V.S., H.v.B. Visualization: A.S.G.-  
481 R., H.A., V.S., H.v.B. Funding Acquisition: E.M.S., V.S., H.v.B. Project administration: K.S.,  
482 E.M.S., V.S., H.v.B. Supervision: E.M.S., V.S., H.v.B. Writing – First draft: A.S.G.-R., H.A.,  
483 H.v.B. Writing – Review and editing: A.S.G.-R., H.A., J.M.C, F.K. E.M.S., V.S., H.v.B.

484

485 **COMPETING INTERESTS**

486 The Icahn School of Medicine at Mount Sinai has filed patent applications relating to SARS-CoV-  
487 2 serological assays (U.S. Provisional Application Numbers: 62/994,252, 63/018,457, 63/020,503  
488 and 63/024,436) and NDV-based SARS-CoV-2 vaccines (U.S. Provisional Application Number:  
489 63/251,020) which list Florian Krammer as co-inventor. Viviana Simon is also listed on the  
490 serological assay patent application as co-inventor. Patent applications were submitted by the  
491 Icahn School of Medicine at Mount Sinai. Mount Sinai has spun out a company, Kantaro, to market  
492 serological tests for SARS-CoV-2. Florian Krammer has consulted for Merck and Pfizer (before  
493 2020), and is currently consulting for Pfizer, Third Rock Ventures, Seqirus and Avimex. The  
494 Krammer laboratory is also collaborating with Pfizer on animal models of SARS-CoV-2. Robert  
495 Sebra is VP of Technology Development and a stockholder at Sema4, a Mount Sinai Venture. This  
496 work, however, was conducted solely at Icahn School of Medicine at Mount Sinai.

497

498 **ADDITIONAL INFORMATION STATEMENT**

499 Correspondence and requests for materials should be addressed to Drs. Sordillo, Simon and/or van  
500 Bakel.

501

502 **DATA AND CODE AVAILABILITY STATEMENT**

503 Custom code used in this study is available at [https://github.com/mjsull/COVID\\_pipe](https://github.com/mjsull/COVID_pipe). Complete  
504 genome sequences for the viral isolates cultured from nasal swabs (BA.1 and BA.1.23) are  
505 available in GISAID.

## 506 REFERENCES

- 507 1 Nextstrain build for novel coronavirus SARS-CoV-2 (2020).
- 508 2 DeGrace, M. M. *et al.* Defining the risk of SARS-CoV-2 variants on immune protection. *Nature*  
509 **605**, 640-652, doi:10.1038/s41586-022-04690-5 (2022).
- 510 3 Flemming, A. Omicron, the great escape artist. *Nat Rev Immunol* **22**, 75, doi:10.1038/s41577-022-  
511 00676-6 (2022).
- 512 4 Plante, J. A. *et al.* The variant gambit: COVID-19's next move. *Cell Host Microbe* **29**, 508-515,  
513 doi:10.1016/j.chom.2021.02.020 (2021).
- 514 5 VanBlargan, L. A. *et al.* An infectious SARS-CoV-2 B.1.1.529 Omicron virus escapes  
515 neutralization by therapeutic monoclonal antibodies. *Nat Med* **28**, 490-495, doi:10.1038/s41591-  
516 021-01678-y (2022).
- 517 6 Corey, L. *et al.* SARS-CoV-2 Variants in Patients with Immunosuppression. *N Engl J Med* **385**,  
518 562-566, doi:10.1056/NEJMs2104756 (2021).
- 519 7 Avanzato, V. A. *et al.* Case Study: Prolonged Infectious SARS-CoV-2 Shedding from an  
520 Asymptomatic Immunocompromised Individual with Cancer. *Cell* **183**, 1901-1912 e1909,  
521 doi:10.1016/j.cell.2020.10.049 (2020).
- 522 8 Choi, B. *et al.* Persistence and Evolution of SARS-CoV-2 in an Immunocompromised Host. *N Engl*  
523 *J Med* **383**, 2291-2293, doi:10.1056/NEJMc2031364 (2020).
- 524 9 Kemp, S. A. *et al.* SARS-CoV-2 evolution during treatment of chronic infection. *Nature* **592**, 277-  
525 282, doi:10.1038/s41586-021-03291-y (2021).
- 526 10 Truong, T. T. *et al.* Increased viral variants in children and young adults with impaired humoral  
527 immunity and persistent SARS-CoV-2 infection: A consecutive case series. *EBioMedicine* **67**,  
528 103355, doi:10.1016/j.ebiom.2021.103355 (2021).
- 529 11 Scherer, E. M. *et al.* SARS-CoV-2 Evolution and Immune Escape in Immunocompromised  
530 Patients. *N Engl J Med* **386**, 2436-2438, doi:10.1056/NEJMc2202861 (2022).
- 531 12 Cele, S. *et al.* SARS-CoV-2 prolonged infection during advanced HIV disease evolves extensive  
532 immune escape. *Cell Host Microbe* **30**, 154-162 e155, doi:10.1016/j.chom.2022.01.005 (2022).
- 533 13 Hoffman, S. A. *et al.* SARS-CoV-2 Neutralization Resistance Mutations in Patient with HIV/AIDS,  
534 California, USA. *Emerg Infect Dis* **27**, 2720-2723, doi:10.3201/eid2710.211461 (2021).
- 535 14 Martin, D. P. *et al.* Selection analysis identifies unusual clustered mutational changes in Omicron  
536 lineage BA.1 that likely impact Spike function. *bioRxiv*, 2022.2001.2014.476382,  
537 doi:10.1101/2022.01.14.476382 (2022).
- 538 15 (CoG-UK), C.-G. C. U. Preliminary genomic characterisation of an emergent SARS-CoV-2 lineage  
539 in the UK defined by a novel set of spike mutations, <<https://virological.org/t/preliminary-genomic->

- 540 [characterisation-of-an-emergent-sars-cov-2-lineage-in-the-uk-defined-by-a-novel-set-of-spike-](#)  
541 [mutations/563](#)> (2020).
- 542 16 Greaney, A. J. *et al.* Mapping mutations to the SARS-CoV-2 RBD that escape binding by different  
543 classes of antibodies. *Nat Commun* **12**, 4196, doi:10.1038/s41467-021-24435-8 (2021).
- 544 17 Starr, T. N. *et al.* Deep Mutational Scanning of SARS-CoV-2 Receptor Binding Domain Reveals  
545 Constraints on Folding and ACE2 Binding. *Cell* **182**, 1295-1310 e1220,  
546 doi:10.1016/j.cell.2020.08.012 (2020).
- 547 18 Escalera, A. *et al.* Mutations in SARS-CoV-2 variants of concern link to increased spike cleavage  
548 and virus transmission. *Cell Host Microbe*, doi:10.1016/j.chom.2022.01.006 (2022).
- 549 19 Saito, A. *et al.* Enhanced fusogenicity and pathogenicity of SARS-CoV-2 Delta P681R mutation.  
550 *Nature* **602**, 300-306, doi:10.1038/s41586-021-04266-9 (2022).
- 551 20 Meng, B. *et al.* Altered TMPRSS2 usage by SARS-CoV-2 Omicron impacts infectivity and  
552 fusogenicity. *Nature* **603**, 706-714, doi:10.1038/s41586-022-04474-x (2022).
- 553 21 *Fact sheet for healthcare providers: Emergency use authorization for bebtelovimab.*, <  
554 <https://pi.lilly.com/eua/bebtelovimab-eua-factsheet-hcp.pdf#page=12>> (2022).
- 555 22 Szemiel, A. M. *et al.* In vitro selection of Remdesivir resistance suggests evolutionary predictability  
556 of SARS-CoV-2. *PLoS Pathog* **17**, e1009929, doi:10.1371/journal.ppat.1009929 (2021).
- 557 23 Gandhi, S. *et al.* De novo emergence of a remdesivir resistance mutation during treatment of  
558 persistent SARS-CoV-2 infection in an immunocompromised patient: a case report. *Nat Commun*  
559 **13**, 1547, doi:10.1038/s41467-022-29104-y (2022).
- 560 24 Checkmahomed, L. *et al.* In Vitro Selection of Remdesivir-Resistant SARS-CoV-2 Demonstrates  
561 High Barrier to Resistance. *Antimicrob Agents Chemother* **66**, e0019822, doi:10.1128/aac.00198-  
562 22 (2022).
- 563 25 Agostini, M. L. *et al.* Coronavirus Susceptibility to the Antiviral Remdesivir (GS-5734) Is  
564 Mediated by the Viral Polymerase and the Proofreading Exoribonuclease. *mBio* **9**,  
565 doi:10.1128/mBio.00221-18 (2018).
- 566 26 Martinot, M. *et al.* Emerging RNA-Dependent RNA Polymerase Mutation in a Remdesivir-Treated  
567 B-cell Immunodeficient Patient With Protracted Coronavirus Disease 2019. *Clin Infect Dis* **73**,  
568 e1762-e1765, doi:10.1093/cid/ciaa1474 (2021).
- 569 27 Tchesnokov, E. P. *et al.* Template-dependent inhibition of coronavirus RNA-dependent RNA  
570 polymerase by remdesivir reveals a second mechanism of action. *J Biol Chem* **295**, 16156-16165,  
571 doi:10.1074/jbc.AC120.015720 (2020).
- 572 28 Zhou, Y. *et al.* Nirmatrelvir Resistant SARS-CoV-2 Variants with High Fitness in Vitro. *bioRxiv*,  
573 2022.2006.2006.494921, doi:10.1101/2022.06.06.494921 (2022).

- 574 29 Carreno, J. M. *et al.* Activity of convalescent and vaccine serum against SARS-CoV-2 Omicron.  
575 *Nature* **602**, 682-688, doi:10.1038/s41586-022-04399-5 (2022).
- 576 30 Cele, S. *et al.* Omicron extensively but incompletely escapes Pfizer BNT162b2 neutralization.  
577 *Nature* **602**, 654-656, doi:10.1038/s41586-021-04387-1 (2022).
- 578 31 Dejnirattisai, W. *et al.* SARS-CoV-2 Omicron-B.1.1.529 leads to widespread escape from  
579 neutralizing antibody responses. *Cell* **185**, 467-484 e415, doi:10.1016/j.cell.2021.12.046 (2022).
- 580 32 *Omicron Receptor Binding Domain Deep Mutational Scanning Data*,  
581 <[https://jbloombio.github.io/SARS-CoV-2-RBD\\_DMS\\_Omicron/](https://jbloombio.github.io/SARS-CoV-2-RBD_DMS_Omicron/)> (
- 582 33 Obermeyer, F. *et al.* Analysis of 6.4 million SARS-CoV-2 genomes identifies mutations associated  
583 with fitness. *Science* **376**, 1327-1332, doi:10.1126/science.abm1208 (2022).
- 584 34 Thorne, L. G. *et al.* Evolution of enhanced innate immune evasion by SARS-CoV-2. *Nature* **602**,  
585 487-495, doi:10.1038/s41586-021-04352-y (2022).
- 586 35 Jian, F. *et al.* Further humoral immunity evasion of emerging SARS-CoV-2 BA.4 and BA.5  
587 subvariants. *bioRxiv*, 2022.2008.2009.503384, doi:10.1101/2022.08.09.503384 (2022).
- 588 36 Jary, A. *et al.* Evolution of viral quasispecies during SARS-CoV-2 infection. *Clin Microbiol Infect*  
589 **26**, 1560 e1561-1560 e1564, doi:10.1016/j.cmi.2020.07.032 (2020).
- 590 37 Xu, D., Zhang, Z. & Wang, F. S. SARS-associated coronavirus quasispecies in individual patients.  
591 *N Engl J Med* **350**, 1366-1367, doi:10.1056/NEJMc032421 (2004).
- 592 38 Karamitros, T. *et al.* SARS-CoV-2 exhibits intra-host genomic plasticity and low-frequency  
593 polymorphic quasispecies. *J Clin Virol* **131**, 104585, doi:10.1016/j.jcv.2020.104585 (2020).
- 594 39 Briese, T. *et al.* Middle East respiratory syndrome coronavirus quasispecies that include  
595 homologues of human isolates revealed through whole-genome analysis and virus cultured from  
596 dromedary camels in Saudi Arabia. *mBio* **5**, e01146-01114, doi:10.1128/mBio.01146-14 (2014).
- 597 40 Tonkin-Hill, G. *et al.* Patterns of within-host genetic diversity in SARS-CoV-2. *Elife* **10**,  
598 doi:10.7554/eLife.66857 (2021).
- 599 41 Valesano, A. L. *et al.* Temporal dynamics of SARS-CoV-2 mutation accumulation within and  
600 across infected hosts. *PLoS Pathog* **17**, e1009499, doi:10.1371/journal.ppat.1009499 (2021).
- 601 42 Wang, Y. *et al.* Intra-host variation and evolutionary dynamics of SARS-CoV-2 populations in  
602 COVID-19 patients. *Genome Med* **13**, 30, doi:10.1186/s13073-021-00847-5 (2021).
- 603 43 Sun, F. *et al.* SARS-CoV-2 Quasispecies Provides an Advantage Mutation Pool for the Epidemic  
604 Variants. *Microbiol Spectr* **9**, e0026121, doi:10.1128/Spectrum.00261-21 (2021).
- 605 44 Gonzalez-Reiche, A. S. *et al.* Introductions and early spread of SARS-CoV-2 in the New York City  
606 area. *Science*, doi:10.1126/science.abc1917 (2020).

607 45 Hernandez, M. M. *et al.* Molecular evidence of SARS-CoV-2 in New York before the first  
608 pandemic wave. *Nat Commun* **12**, 3463, doi:10.1038/s41467-021-23688-7 (2021).

609 46 Simon, V. *et al.* PARIS and SPARTA: Finding the Achilles' Heel of SARS-CoV-2. *mSphere* **7**,  
610 e0017922, doi:10.1128/msphere.00179-22 (2022).

611 47 Ondov, B. D. *et al.* Mash: fast genome and metagenome distance estimation using MinHash.  
612 *Genome Biol* **17**, 132, doi:10.1186/s13059-016-0997-x (2016).

613 48 Hadfield, J. *et al.* Nextstrain: real-time tracking of pathogen evolution. *Bioinformatics* **34**, 4121-  
614 4123, doi:10.1093/bioinformatics/bty407 (2018).

615 49 Aksamentov, I. R., Cornelius; Hodcroft, Emma B.; Neher, Richard A. Nextclade: clade assignment,  
616 mutation calling and quality control for viral genomes. *Journal of Open Source Software* **6**, 3773,  
617 doi:10.21105/joss.03773 (2021).

618 50 Phylogenetic assignment of named global outbreak lineages v. 2020-05-19 (2020).

619 51 O'Toole, A. *et al.* Tracking the international spread of SARS-CoV-2 lineages B.1.1.7 and  
620 B.1.351/501Y-V2 with grinch. *Wellcome Open Res* **6**, 121,  
621 doi:10.12688/wellcomeopenres.16661.2 (2021).

622 52 Amanat, F. *et al.* An In Vitro Microneutralization Assay for SARS-CoV-2 Serology and Drug  
623 Screening. *Curr Protoc Microbiol* **58**, e108, doi:10.1002/cpmc.108 (2020).

624



626 Table 1: Spike mutations detected in the sequenced cases.

| Pat | Sex | Age   | Days from P1 first positive specimen | GISAID Accession number (EPI_ISL) | Source     | Lineage  | Mutations in Spike relative to earliest sample<br>(BA.1: A67V, T95I, Y145D, L212I, G339D, S371L, S373P, S375F, K417N, N440K, G446S, S477N, T478K, E484A, Q493R, G496S, Q498R, N501Y, Y505H, T547K, D614G, H655Y, N679K, P681H, N764K, D796Y, N856K, Q954H, N969K, L981F) # |      |      |      |      |      |      |      |      |      |      |      |      |      |
|-----|-----|-------|--------------------------------------|-----------------------------------|------------|----------|----------------------------------------------------------------------------------------------------------------------------------------------------------------------------------------------------------------------------------------------------------------------------|------|------|------|------|------|------|------|------|------|------|------|------|------|
|     |     |       |                                      |                                   |            |          | E96                                                                                                                                                                                                                                                                        | L176 | S254 | R346 | S371 | V445 | N448 | L455 | F456 | K458 | S477 | E484 | T547 | S680 |
|     |     |       | 0                                    | N/A                               | This study |          |                                                                                                                                                                                                                                                                            |      |      |      |      |      |      |      |      |      |      |      |      |      |
|     |     |       | 23                                   | 11897513                          | This study | BA.1     |                                                                                                                                                                                                                                                                            |      | L    |      |      |      |      | A    |      | H    | V    | F    |      |      |
|     |     |       | 40                                   | 11897516                          | This study | BA.1     |                                                                                                                                                                                                                                                                            |      | T    | L    |      |      | M    | V    |      | H    | V    | F    |      |      |
| P1  | M   | 61-65 | 48                                   | 11178997                          | This study | BA.1.23  |                                                                                                                                                                                                                                                                            |      | T    | L    |      |      | M    | V    |      | H    | V    | F    |      |      |
|     |     |       | 64                                   | 11179080                          | This study | BA.1.23  |                                                                                                                                                                                                                                                                            | F    | T    | L    |      |      | M    | V    |      | Y    | V    | F    |      |      |
|     |     |       | 72                                   | 11685451                          | This study | BA.1.23  | D                                                                                                                                                                                                                                                                          |      | T    | L    |      | W    | M    | V    |      | H    | V    | F    |      |      |
|     |     |       | 81                                   | 11897525                          | This study | BA.1.23+ |                                                                                                                                                                                                                                                                            | F    | T    | L    |      | W    | M    | D    | V    |      | Y    | V    | F    |      |
| P2  | F   | 66-70 | 76                                   | 11685480                          | This study | BA.1.23  | D                                                                                                                                                                                                                                                                          |      | T    | L    |      | W    | M    | V    |      | A    | H    | V    | F    |      |
|     |     |       | 101                                  | 12422465                          | This study | BA.1.23  | D                                                                                                                                                                                                                                                                          |      | T    | L    |      | W    | M    | V    |      |      | R    | V    | F    |      |
|     |     |       | 111                                  | 13350580                          | This study | BA.1.23  | D                                                                                                                                                                                                                                                                          |      | T    | L    |      | W    | M    | V    |      |      | R    | V    | F    |      |
|     |     |       | 114                                  | 12711034                          | This study | BA.1.23  | D                                                                                                                                                                                                                                                                          |      | T    | L    |      | W    | M    | V    |      |      | R    | V    | F    |      |
| P3  | M   | 36-40 | 130                                  | 13350591                          | This study | BA.1.23+ | D                                                                                                                                                                                                                                                                          |      | T    | F    |      | W    | M    | V    |      |      | R    | V    | F    |      |
|     |     |       | 147                                  | n.s.*                             | This study | BA.1.23  | D                                                                                                                                                                                                                                                                          |      | T    | L    |      | W    | M    | V    |      |      | R    | V    | F    |      |
|     |     |       | 192                                  | n.s.*                             | This study | BA.1.23+ | D                                                                                                                                                                                                                                                                          |      | T    | F    |      | W    | M    | V    |      |      | R    | V    | F    |      |
|     |     |       | 209                                  | n.s.*                             | This study | BA.1.23+ | D                                                                                                                                                                                                                                                                          |      | T    | F    |      | W    | M    | V    |      |      | R    | V    | F    |      |

|    |   |       |     |          |                             |          |   |   |   |          |   |   |   |   |   |          |          |          |   |
|----|---|-------|-----|----------|-----------------------------|----------|---|---|---|----------|---|---|---|---|---|----------|----------|----------|---|
|    |   |       | 213 | n.s.*    | This study                  | BA.1.23  | D |   | T | L        |   | W | M | V |   | <b>R</b> | V        | F        |   |
|    |   |       | 218 | n.s.*    | This study                  | BA.1.23+ | D |   | T | <b>F</b> |   | W | M | V |   | <b>R</b> | V        | F        |   |
|    |   |       | 232 | n.s.*    | This study                  | BA.1.23+ | D | F | T | <b>F</b> | S | W | L | V |   | <b>R</b> | V        | <b>L</b> |   |
|    |   |       | 104 | n.s.*    | This study                  | BA.1.23+ | D |   | T | <b>F</b> |   | W | M | V | K | <b>R</b> | V        | F        |   |
| P4 | F | 61-65 | 111 | 12961673 | This study                  | BA.1.23  | D |   | T | L        |   | W | M | V |   | <b>R</b> | V        | F        |   |
|    |   |       | 125 | 12896972 | This study                  | BA.1.23+ | D |   | T | L        | A | W | M | V |   | <b>R</b> | V        | F        |   |
|    |   |       | 132 | n.s.*    | This study                  | BA.1.23+ | D |   | T | L        |   | W | L | M | V |          | <b>R</b> | V        | F |
| S1 | F | 81-85 | 78  | 11628400 | Howard et al. 2022. GISAI D | BA.1.23  | D |   | T | L        |   | W | M | V |   | <b>R</b> | V        |          |   |
| S2 | F | 26-30 | 79  | 11696379 | Howard et al. 2022. GISAI D | BA.1.23  | D |   | T | L        |   | W | M | V |   | <b>R</b> | V        |          |   |

627 \* n.s.: Consensus not submitted due to presence of >10 intrahost single nucleotide variants. N/A: not sequenced .

628 # Mutations in bold correspond to changes at positions already mutated in BA.1.

629 **FIGURES**

630

**Figure 1**

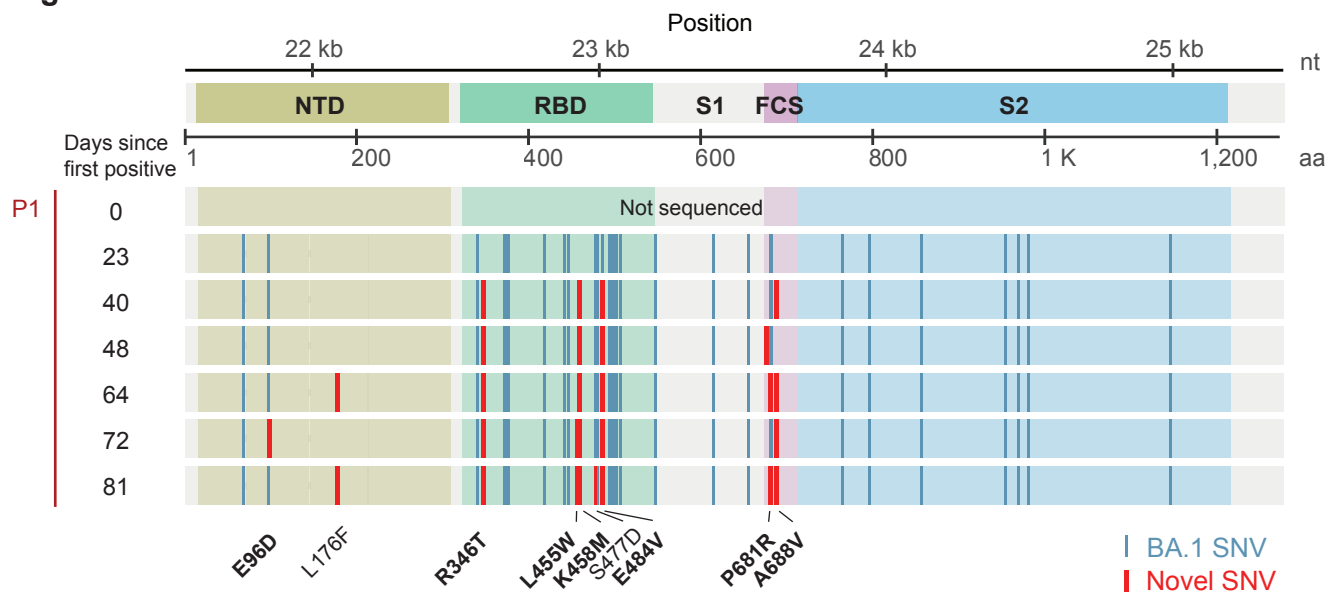

632 **Figure 1. Intrahost emergence of an Omicron BA.1.23 subvariant**

633 Multiple sequence alignment of the SARS-CoV-2 spike protein showing the appearance of  
634 nucleotide and amino acid substitutions in the spike protein in sequential specimens obtained from  
635 the index case (Patient 1, P1).

636

## Figure 2

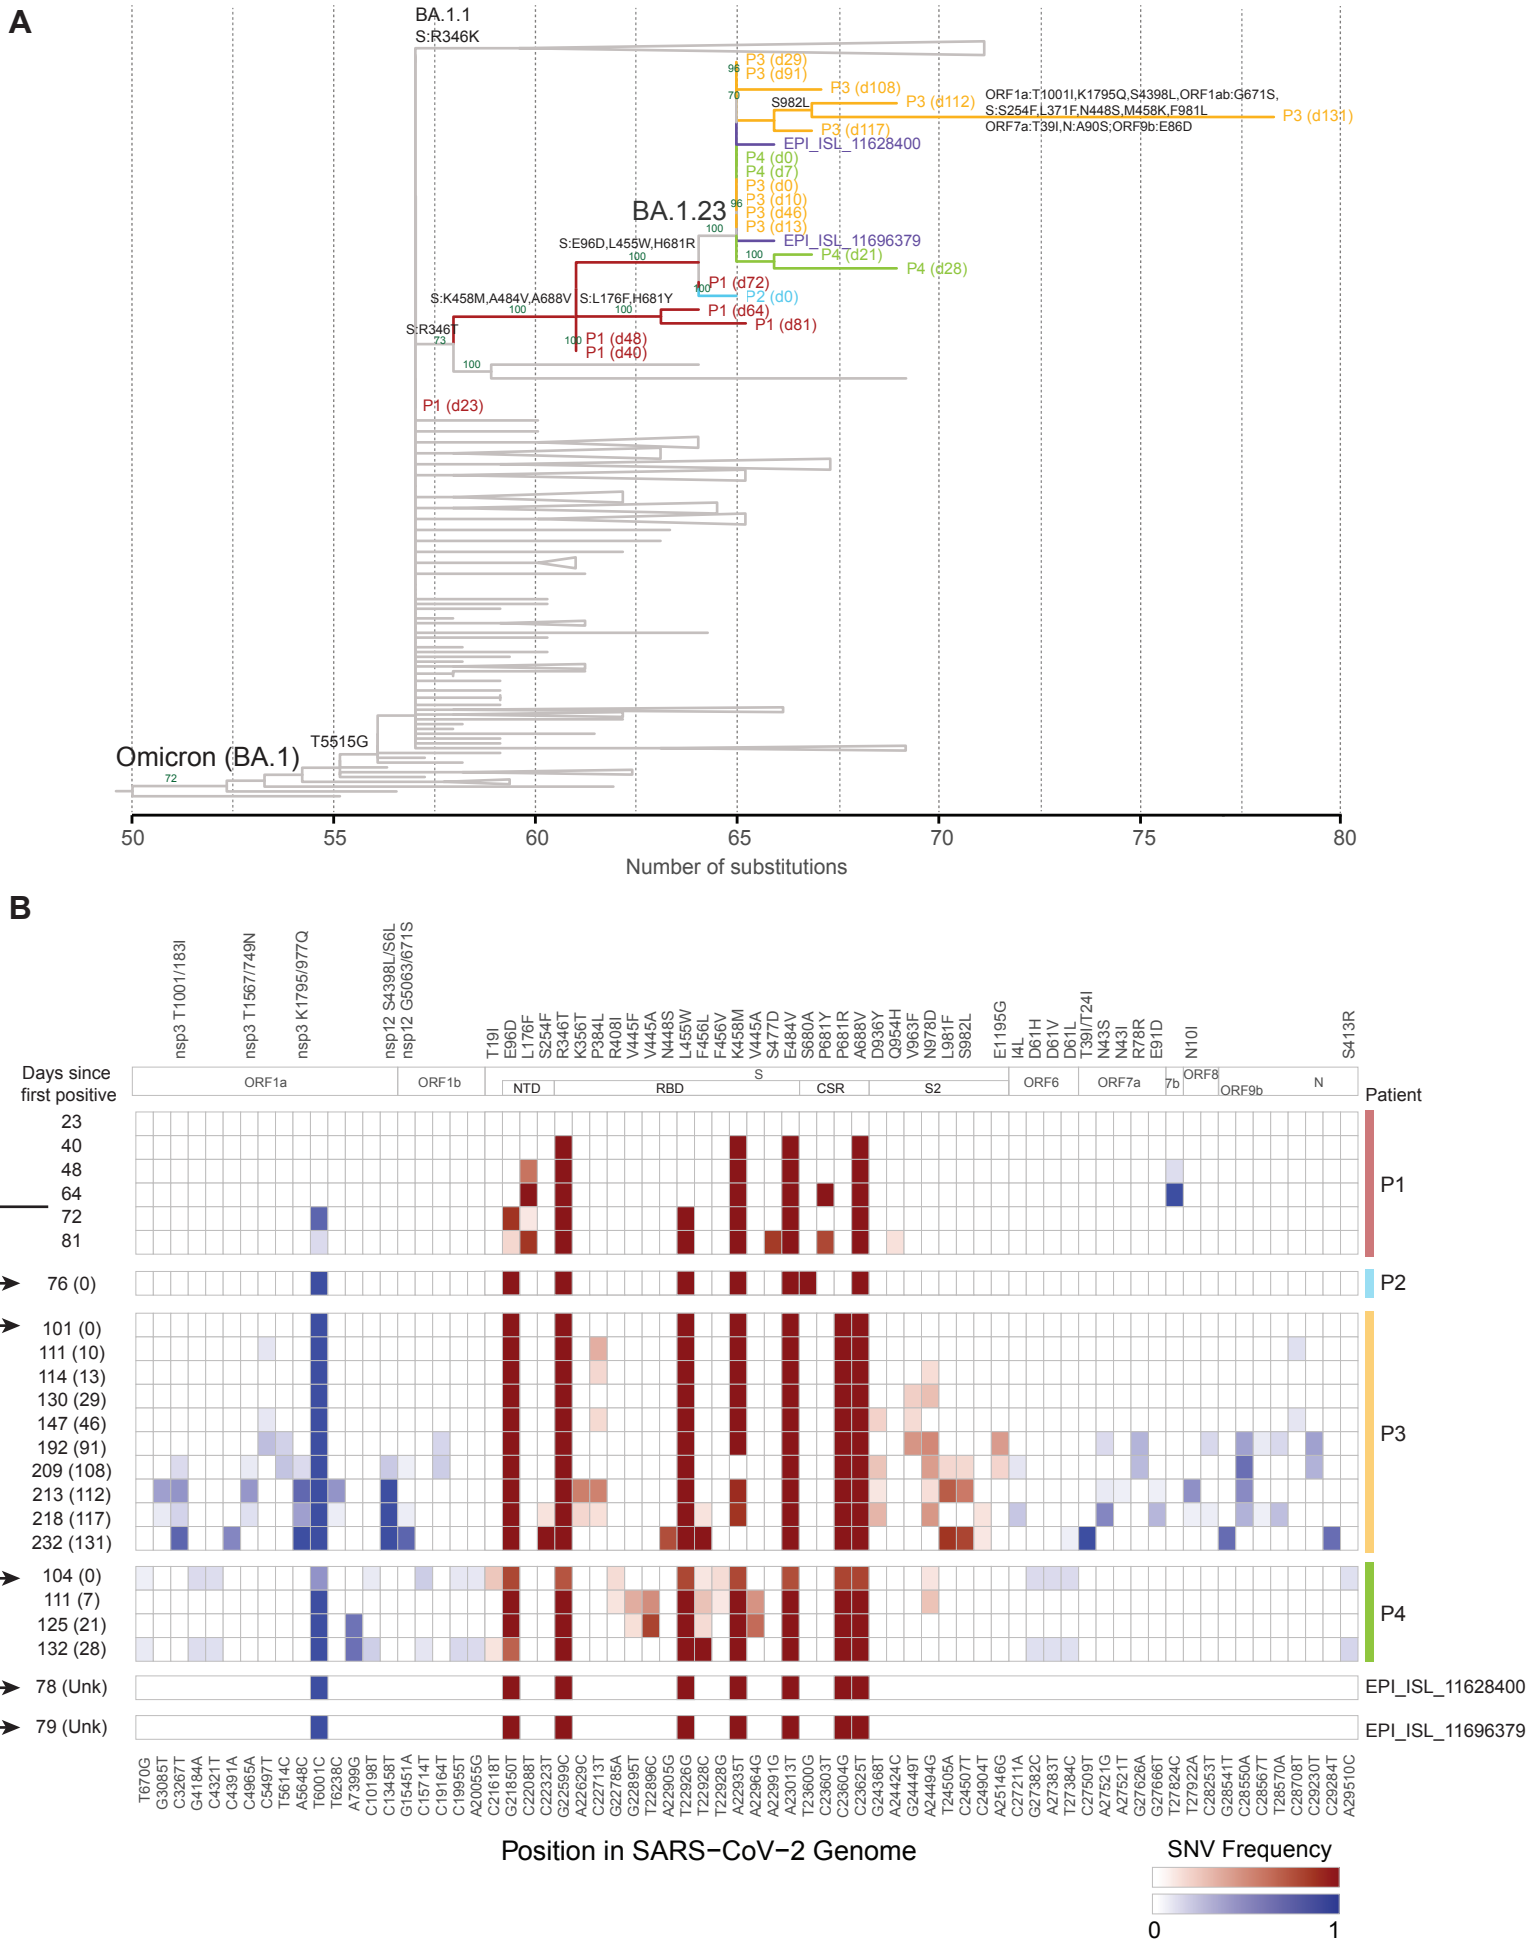

638 **Figure 2. Forward transmission of the Omicron BA.1.23 subvariant**

639 **A)** Maximum likelihood phylogenetic subtree with SARS-CoV-2 (BA.1) sequences from the  
640 persistent infection case P1 and the onward transmissions (P2, P3, P4), in a global background  
641 of sequences available in GISAID. Branches are colored to identify the patient. The number of  
642 days after the first SARS-CoV-2 positive specimen of P1 is indicated in brackets. Sibling  
643 clusters of BA.1 and other sublineages are collapsed for easier visualization. The x-axis shows  
644 the number of nucleotide substitutions relative to the root of the phylogenetic tree. Bootstrap  
645 support values above 70% are shown for the un-collapsed branches. The distinct BA.1  
646 subvariant that was transmitted was designated as PANGO lineage BA.1.23.

647 **B)** Frequency of single nucleotide variants (SNV), and amino acid substitutions for SARS-CoV-  
648 2 genomic positions with consensus changes from ancestral Wuhan-1 and Omicron BA.1.  
649 Positions with mixed nucleotides below consensus are also shown for intrahost SNVs  
650 (mSNVs) seen in more than one time point. The sequenced specimens are shown sequentially  
651 for patient 1 (P1) with prolonged BA.1 infection and transmission cases of BA.1.23 (P2, P3  
652 and P4). The viral genomes from P1 show progressive accumulation of mutations in the N-  
653 terminal domain (NTD), receptor binding domain (RBD), and S1/S2 furin cleavage site (FCS);  
654 The same constellation of mutations was subsequently detected in three documented  
655 transmission cases (P2, P3 and P4). The number of days since the first positive test in P1 is  
656 shown on the left, with the number of days after the first positive test for each patient between  
657 brackets. The mutation frequencies within the Spike protein are shown in red, and for non-  
658 Spike genome regions in blue. Positions are numbered according to the reference genome  
659 sequence NC\_045512.2. Arrows on the left indicate the likely window of transmission from  
660 the index patient between days 64-72.

### Figure 3

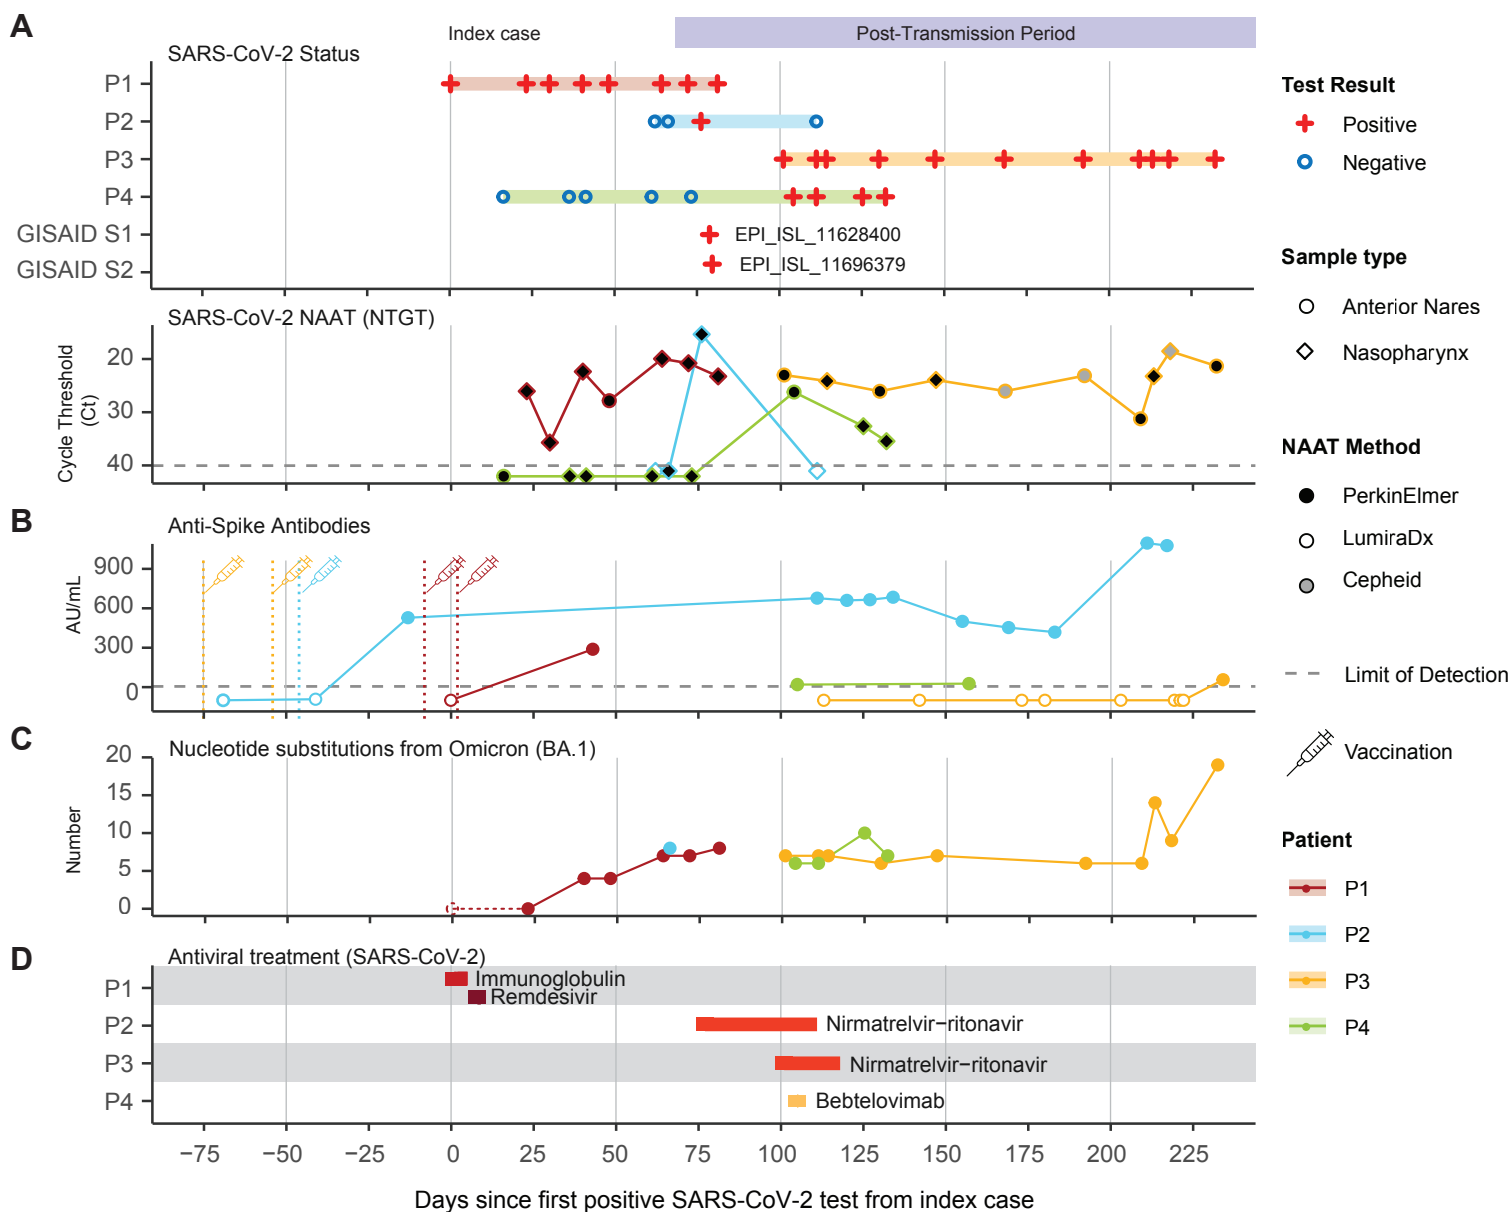



662 **Figure 3. Timeline of BA.1.23 evolution compared to antibody levels and treatments**

663 **A)** The timeline of BA.1.23 infected patients (top) is shown together with nucleic acid  
664 amplification test (NAAT) SARS-CoV-2 (N gene) cycle threshold (Ct) values for respiratory  
665 specimens, for different diagnostic methods (bottom). Empty markers indicate negative tests  
666 by alternative diagnostic tests with no Ct value readout (LumiraDx™).

667 **B)** Number of nucleotide substitutions in the consensus sequence relative to Omicron BA.1 in the  
668 sequenced specimens.

669 **C)** SARS-CoV-2 spike binding IgG antibody levels for P1- P4. Antibody levels are shown in  
670 arbitrary units per mL (AU/mL). Available vaccine information is indicated.

671 **D)** Timeline of SARS-CoV-2 antiviral treatments received by P1-P4. Treatment duration is  
672 indicated by the length of the bar.

673

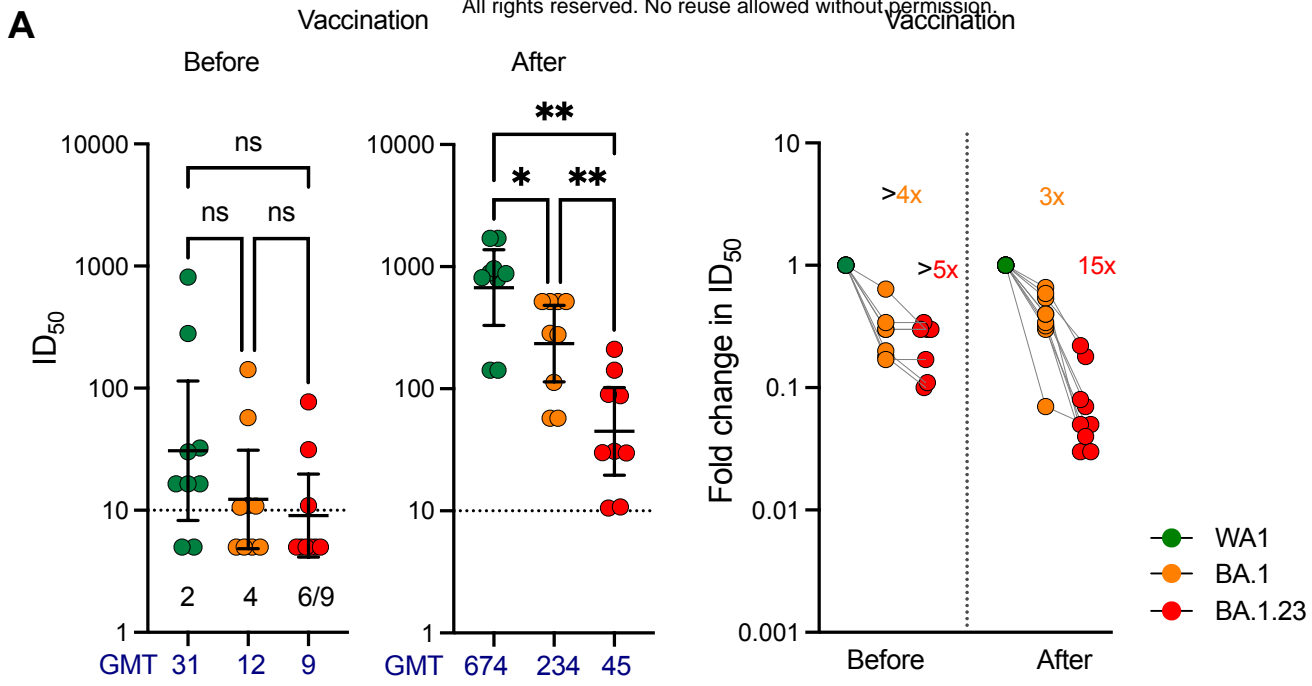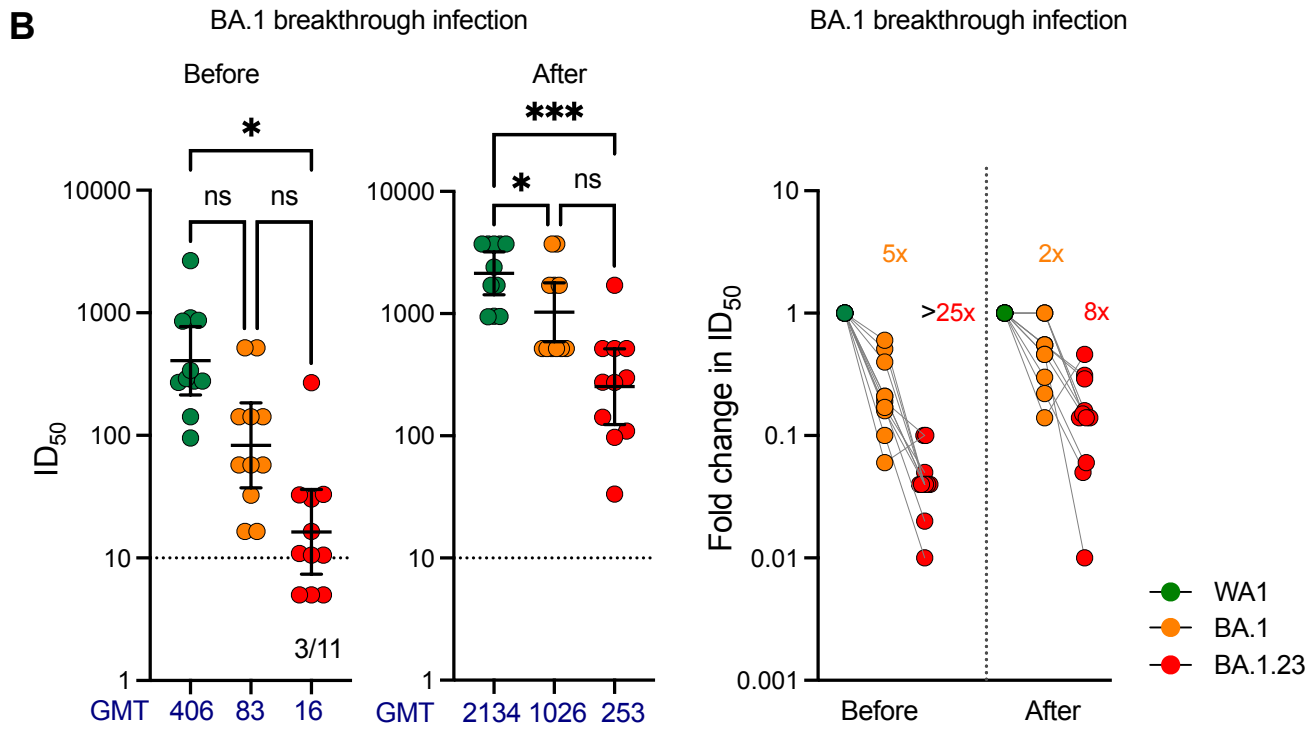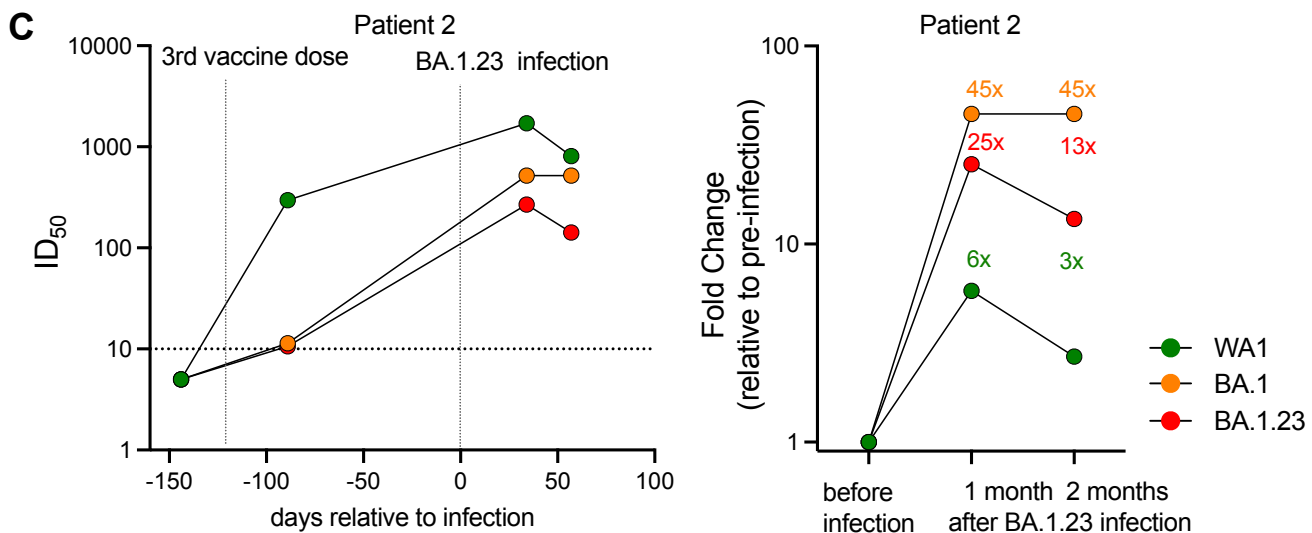

675 **Figure 4. The Omicron BA.1.23 subvariant displays strongly reduced neutralizing activity**  
676 **compared to the parental Omicron variant as well as ancestral SARS-CoV-2 variant.**

677 **A)** Absolute neutralization titers (left) and fold reduction (right) for WA-1, BA.1 and BA.1.23  
678 variants by paired sera from study participants collected before and after booster vaccination.  
679 The two samples with levels below detection for WA-1 were excluded from the fold-change  
680 calculation shown in the right panel.

681 **B)** Absolute neutralization titers (left) and fold-reduction (right) for WA-1, BA.1 and BA.1.23  
682 isolates by sera from study participants who experienced breakthrough infection with BA.1.  
683 Data for paired sera from 11 participants collected before and after BA.1 infection are shown.

684 **C)** Absolute neutralization titers (left) and fold-changes in neutralization titers relative to the post  
685 booster timepoint (right) for each of the isolates (WA-1, BA.1 and BA.1.23) by sera collected  
686 from patient P2 before and after BA1.23 infection. The first vertical dotted line (left) represents  
687 the third vaccine dose. The second vertical dotted line (right) indicates the infection with the  
688 BA.1.23 variant.

689 GMT denotes mean geometric mean of the inhibitory dilution 50% (ID50) values. The  
690 horizontal dotted line represents the limit of detection (10). Samples with neutralization titers  
691 below the level of detection were assigned the neutralization value of 5 (equaling to half of the  
692 limit of detection). Fold changes in neutralization are A one-way ANOVA with Tukey's  
693 multiple comparison test was used to compare the neutralization titers before and after booster  
694 vaccination or BA.1 breakthrough infection. Significant p values (<0.05) are indicated in the  
695 figure. Source data is provided in **Supplementary Table S2**.

696

697 **EXTENDED DATA FIGURES**

698 **Extended Data Figure 1: Overview of genome-wide SARS-CoV-2 mutations found in**  
699 **diagnostic nasal biospecimen.** The mutations present across the complete SARS-CoV-2 genome  
700 are shown. Nucleotide substitutions observed in sequential specimens obtained from patient 1 (P1)  
701 with prolonged infection with BA.1 and forward transmission cases (P2, P3 and P4). There is  
702 accumulation and fixation of new SNVs in the spike region in P1. The same constellation of  
703 mutations was subsequently detected in three documented transmission cases (P2, P3 and P4) and  
704 in two sequences from GISAID (EPI\_ISL\_11628400 and EPI\_ISL\_11696379). The only shared  
705 synonymous SNV outside of the spike (ORF1a:T6001C) is indicated with an arrow. The number  
706 of days since the first positive test in P1 is shown on the left, with the number of days after the  
707 first positive test for each patient between brackets. The BA.1 substitutions are shown in blue and  
708 novel substitutions are shown in red, relative to the reference genome sequence NC\_045512.2.

709 **Extended Data Figure 2: Summary of SARS-CoV-2 mutations within the spike gene in**  
710 **minority viral populations.**

711 The distribution of minority intrahost single nucleotide variants (mSNV) for positions that were  
712 fixed over the course of the infection of the index and transmitted infections are shown indicated  
713 with asterisks. Single nucleotide variants are colored by strain. The dotted bars indicate positions  
714 with coverage below the threshold of 100X coverage for calling mSNVs. The positions with  
715 minority variants present at frequencies  $> 0.1$  are indicated with triangles for their respective  
716 samples.

717

718 **Extended Data Figure 3: Summary of genome-wide SARS-CoV-2 mutations in minority**  
719 **viral populations for patient P3**

720 Similar to Extended Data Fig. 2 but showing the distribution of nucleotide variants below the  
721 consensus level observed in one or more specimens from P3. Single nucleotide variants (SNVs)  
722 are colored by strain. The dotted bars indicate positions with coverage below the threshold of 100X  
723 coverage for calling mSNVs. The positions with minority variants present at frequencies  $> 0.1\%$   
724 are indicated with triangles (nonsynonymous) or circles (synonymous) for their respective  
725 samples.

726 **Extended Data Figure 4: Summary of SARS-CoV-2 mutations within the Spike gene in**  
727 **minority viral populations for patient P3**

728 Similar to Extended Data Fig. 3 but showing minority mutations in the Spike gene region. Single  
729 nucleotide variants (SNVs) are colored by strain. The dotted bars indicate positions with coverage  
730 below the threshold of 100X coverage for calling minor SNVs (mSNVs). The positions with  
731 minority variants present at frequencies  $> 0.1$  are indicated with triangles for their respective  
732 samples.

733

# Extended Data Figure 1

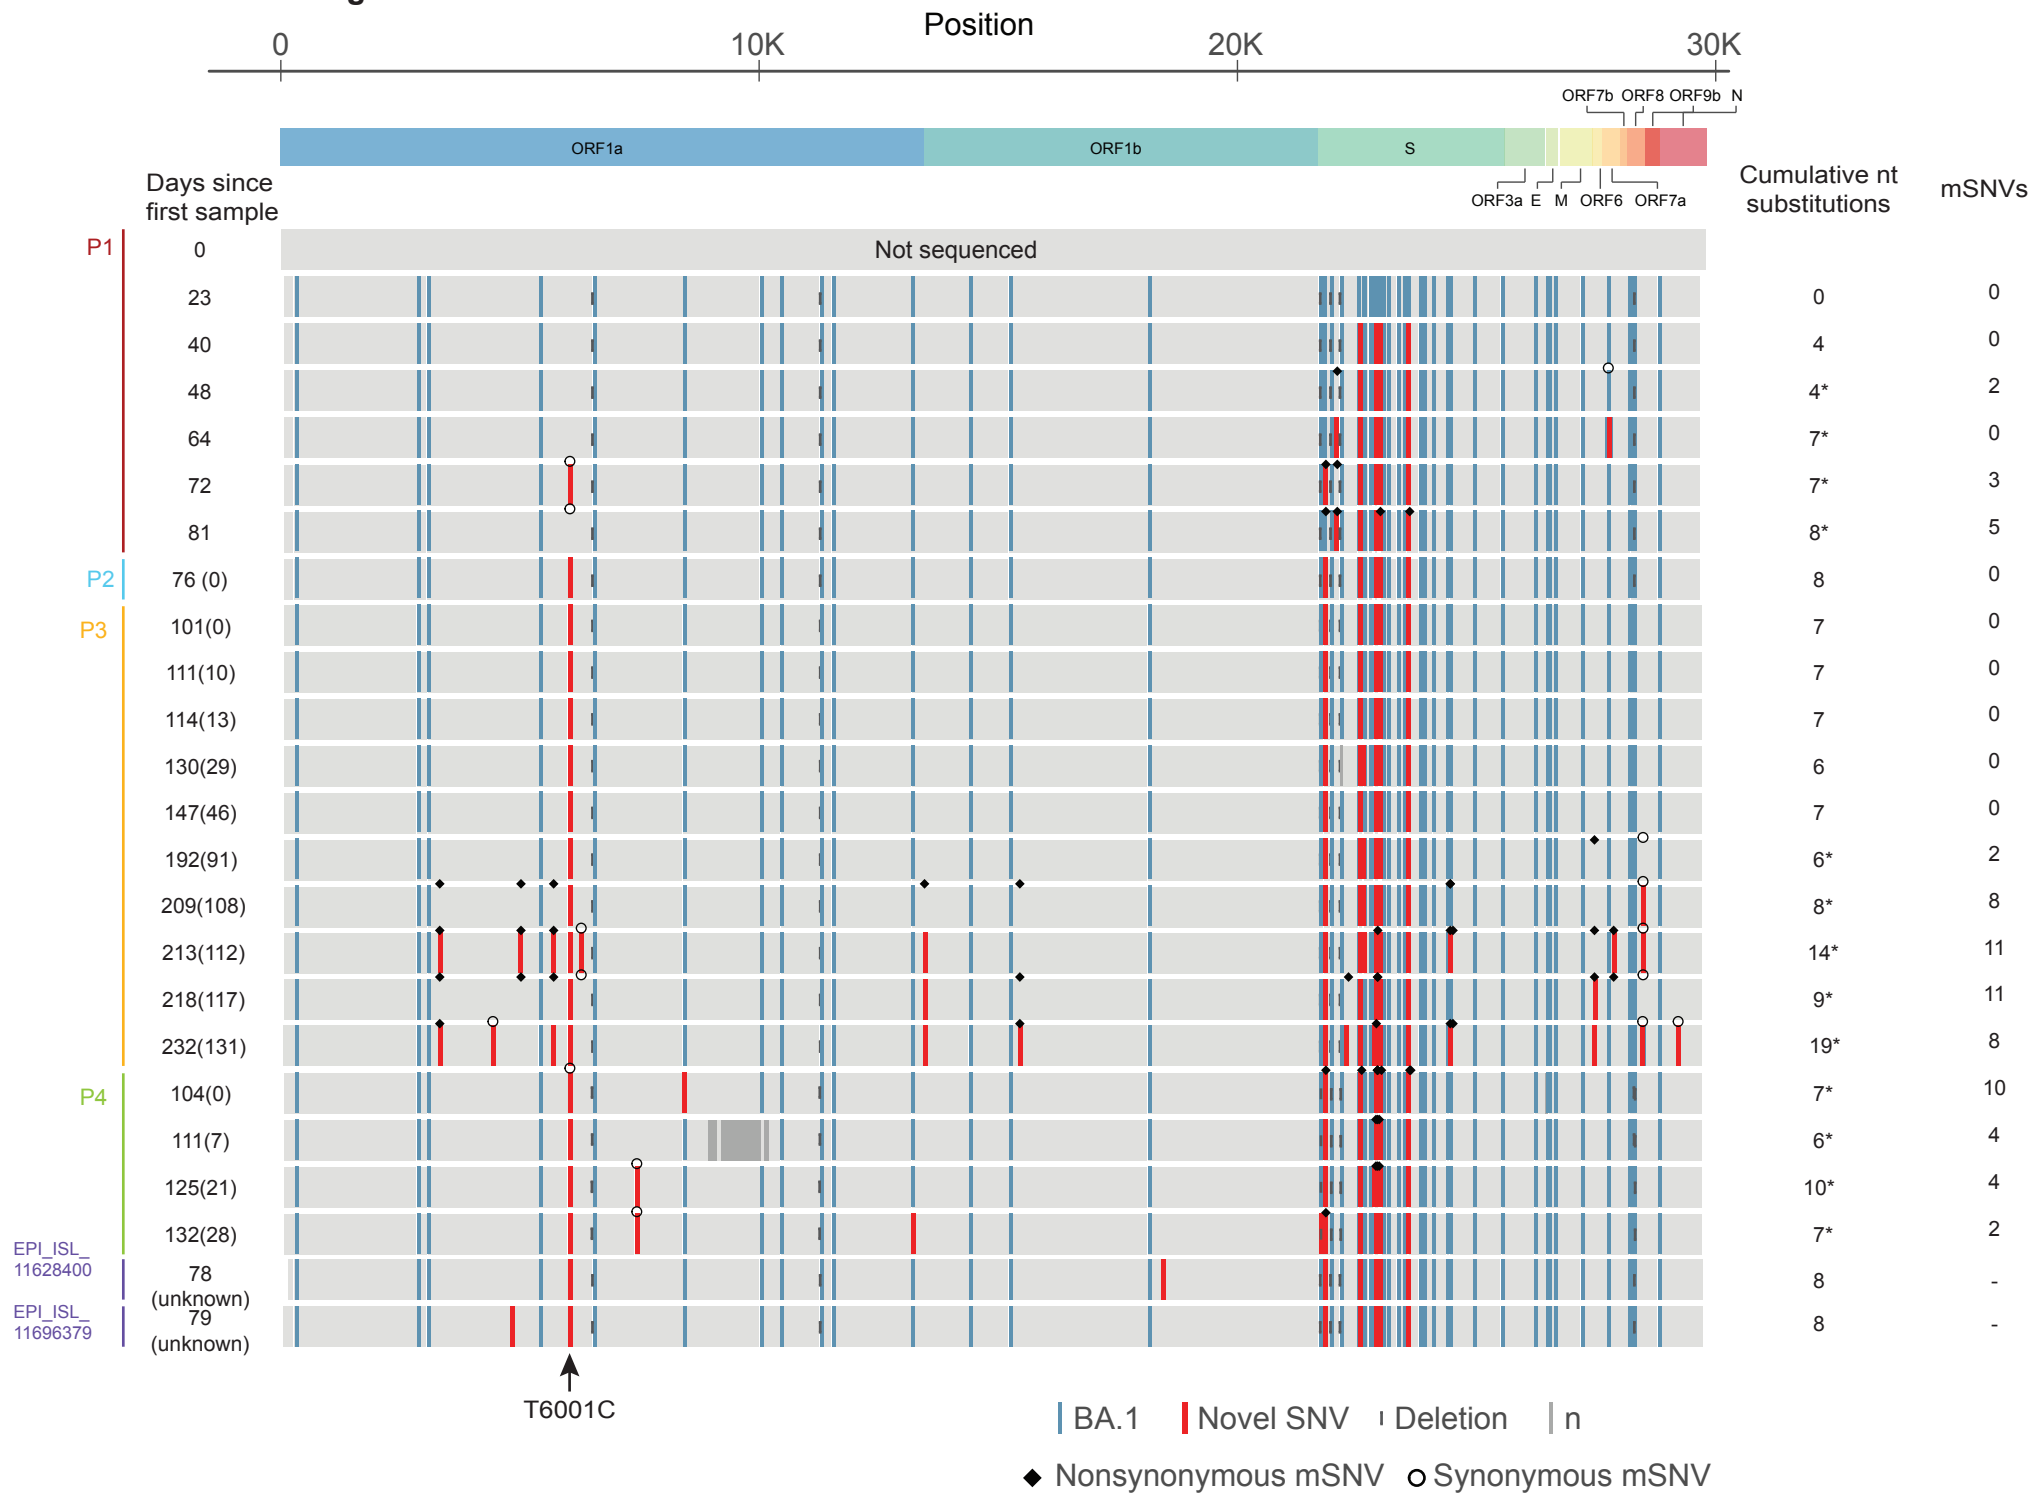



## Extended Data Figure 2

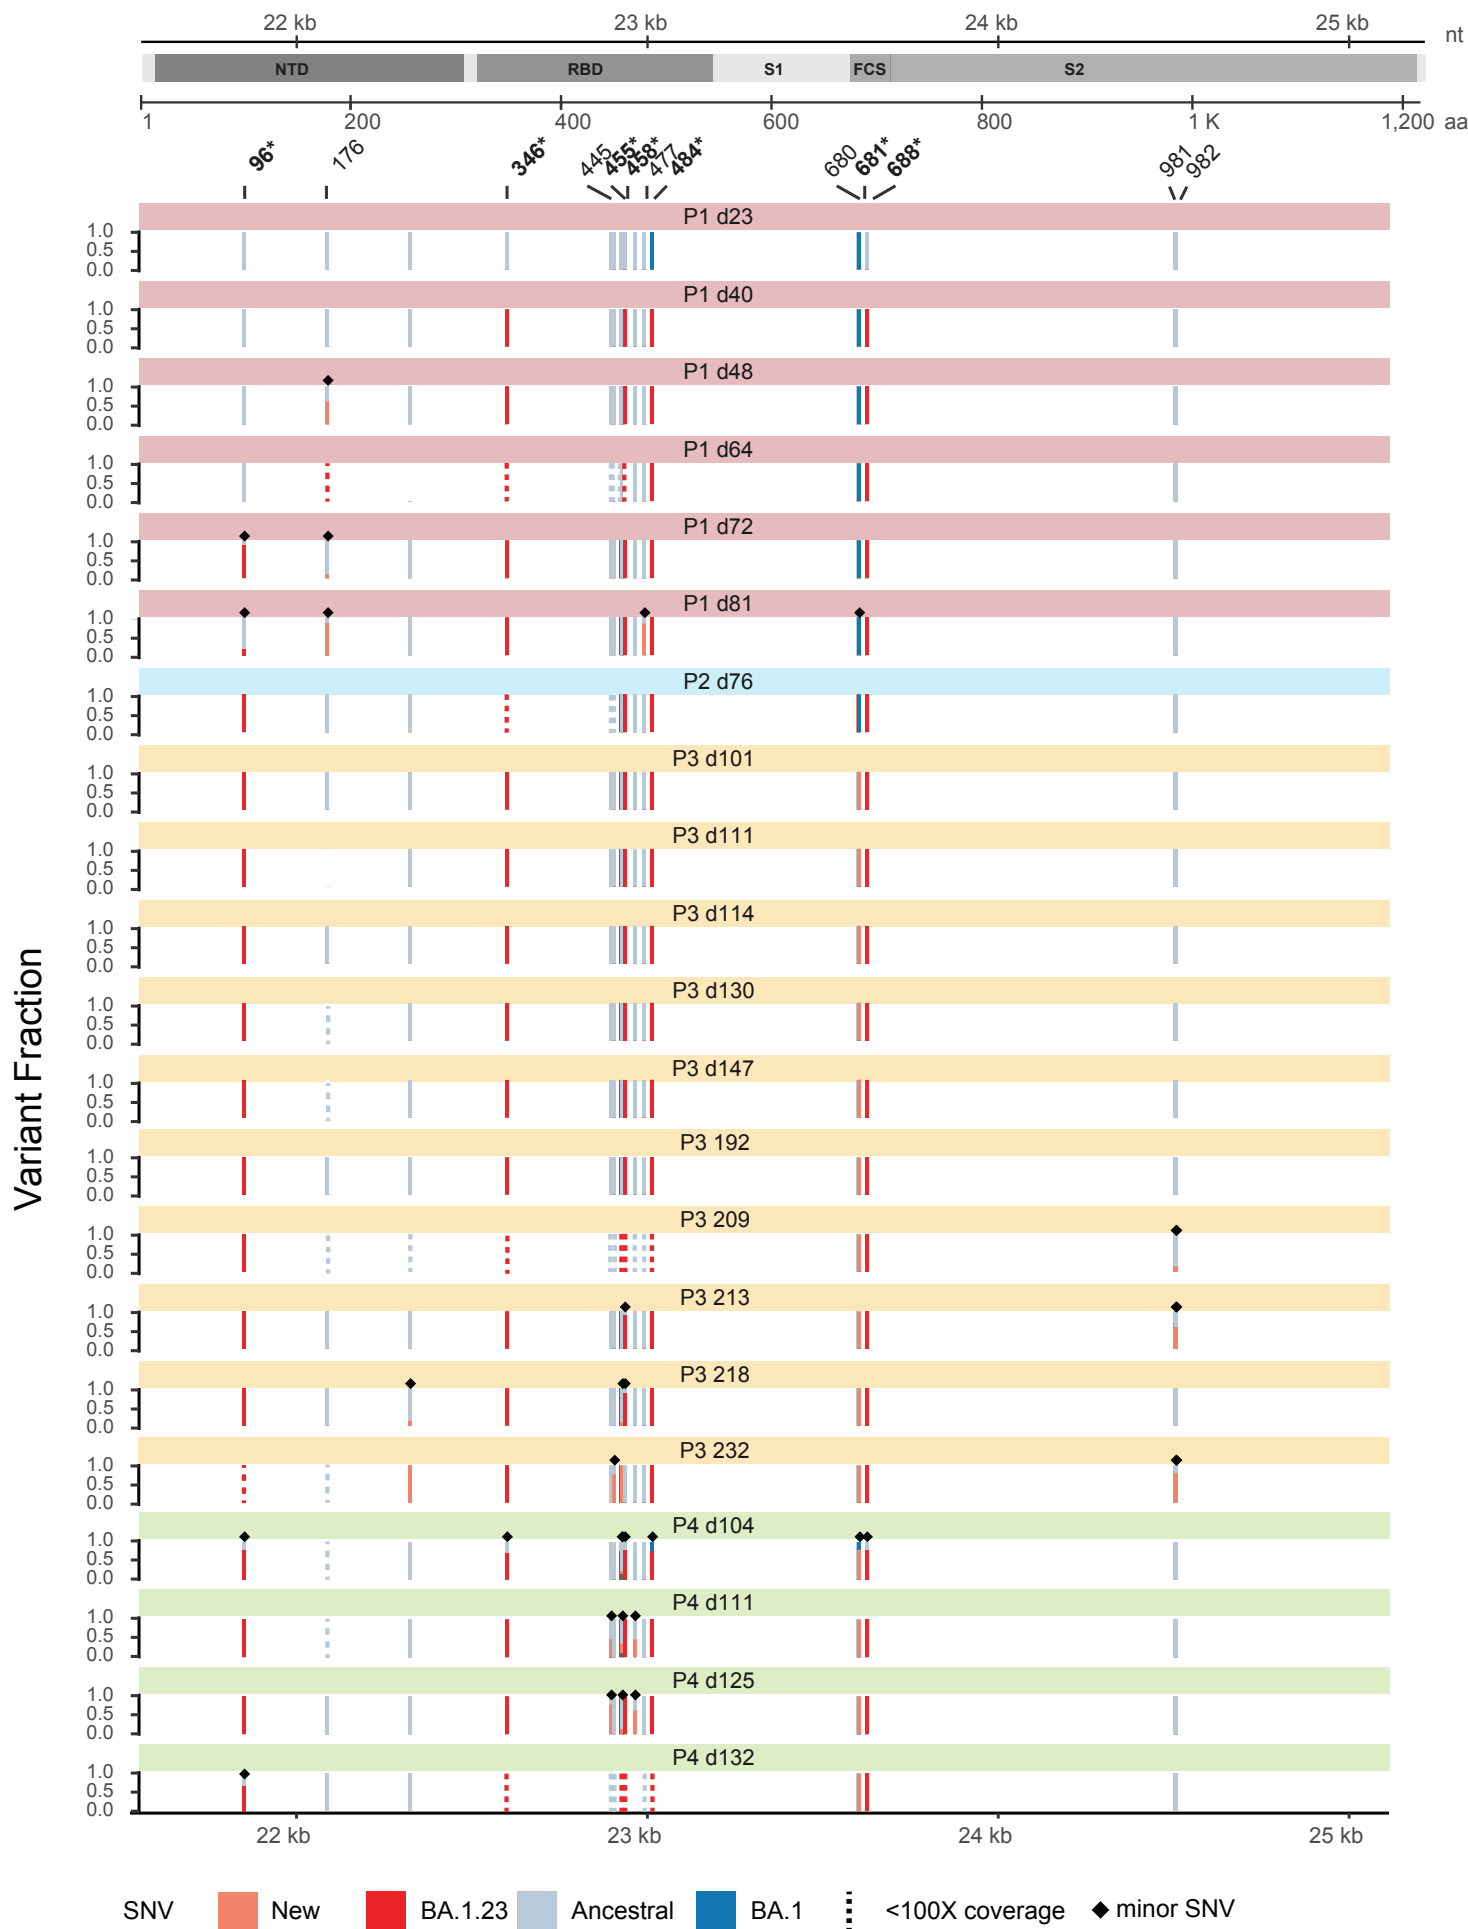

Extended Data Figure 3

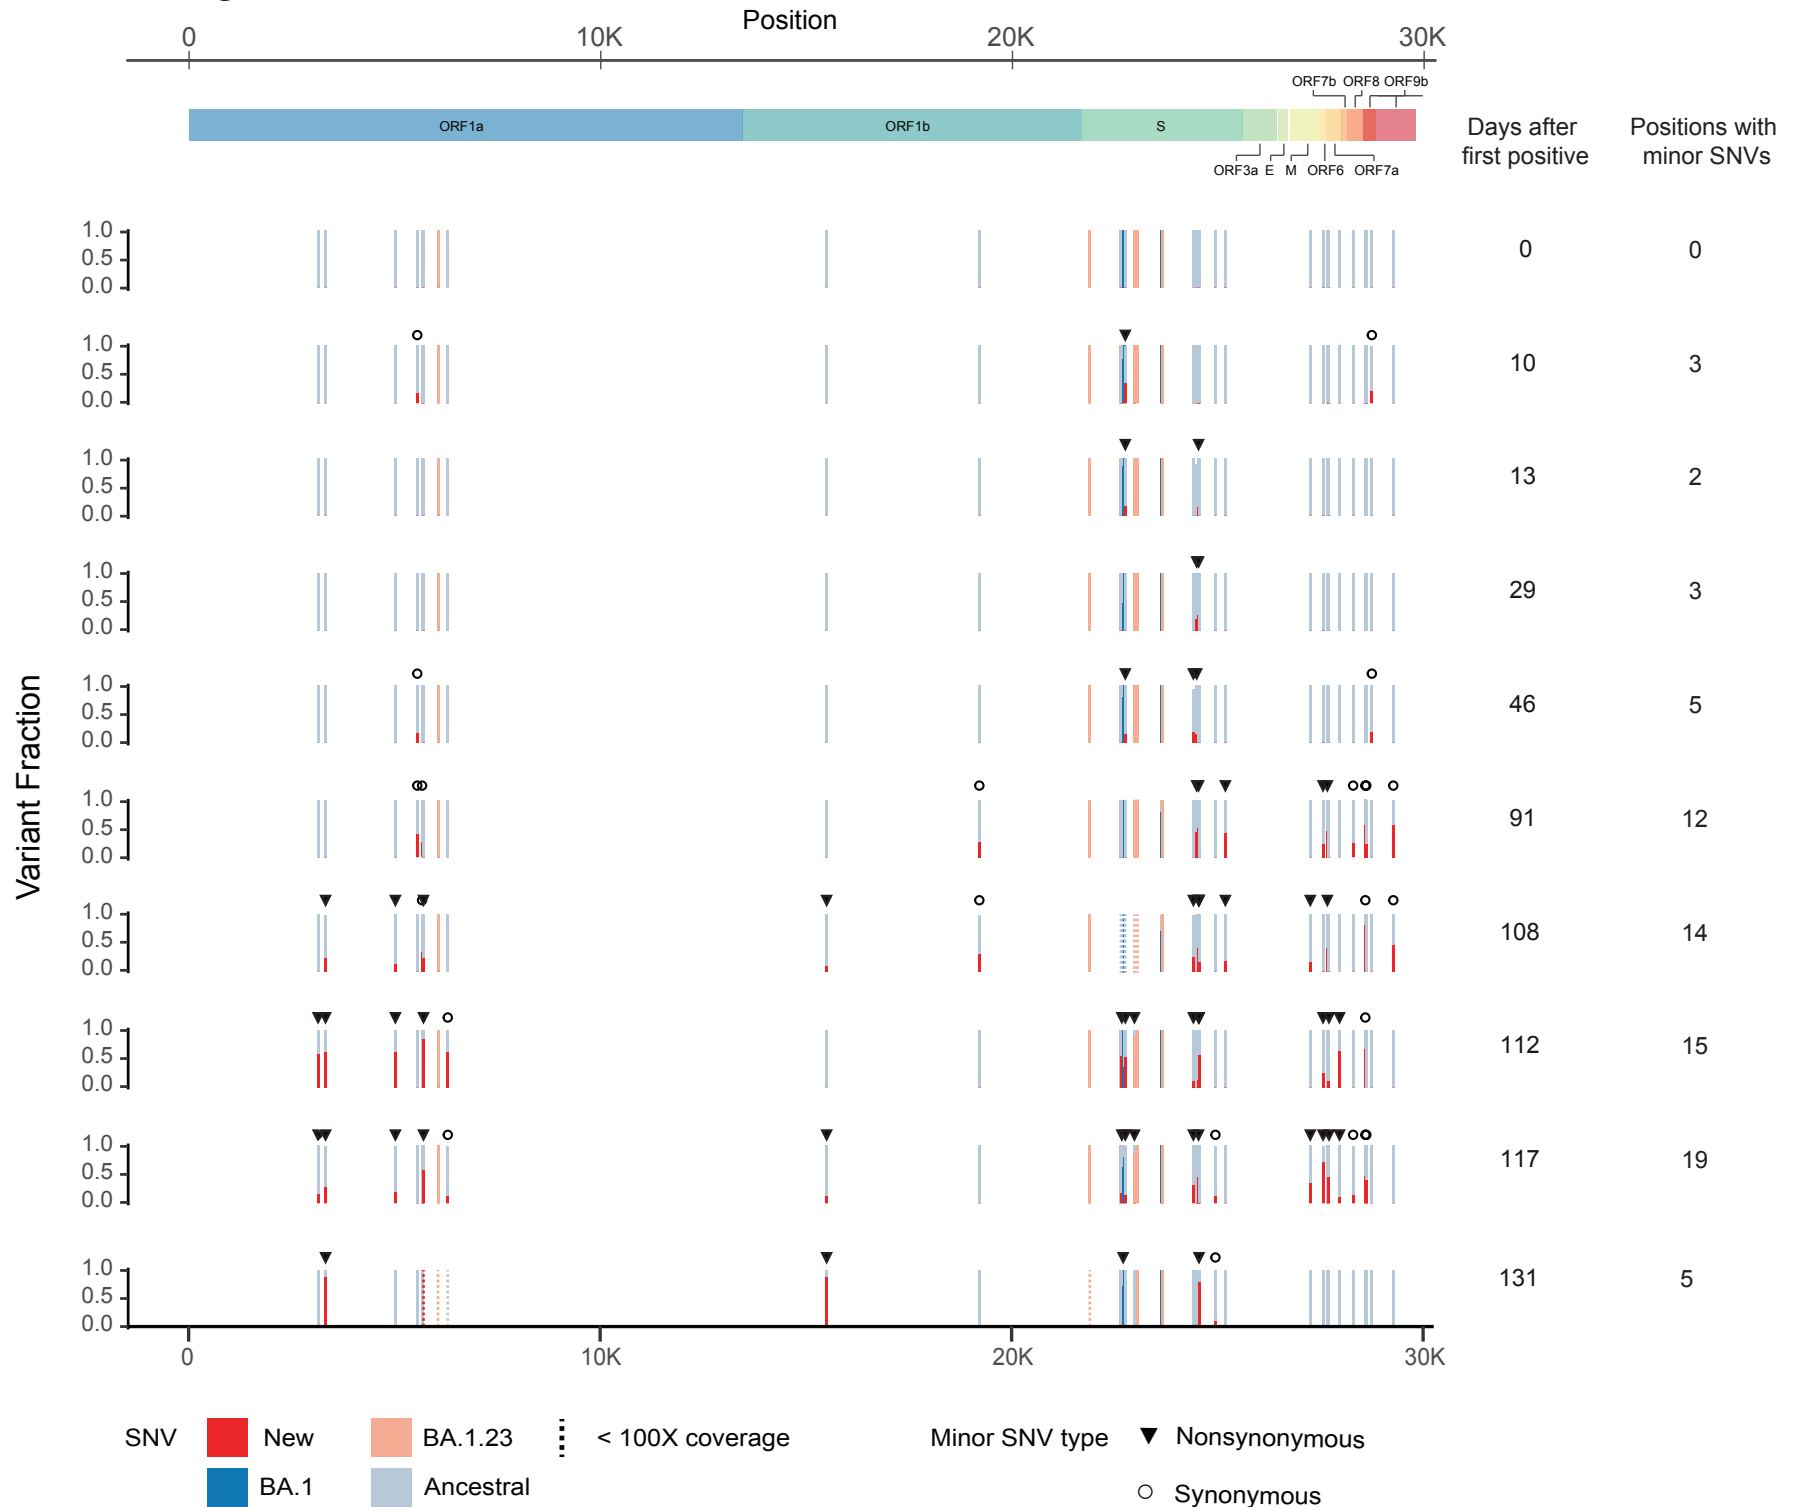

## Extended Data Figure 4

### Position in SARS-CoV-2 genome (Spike)

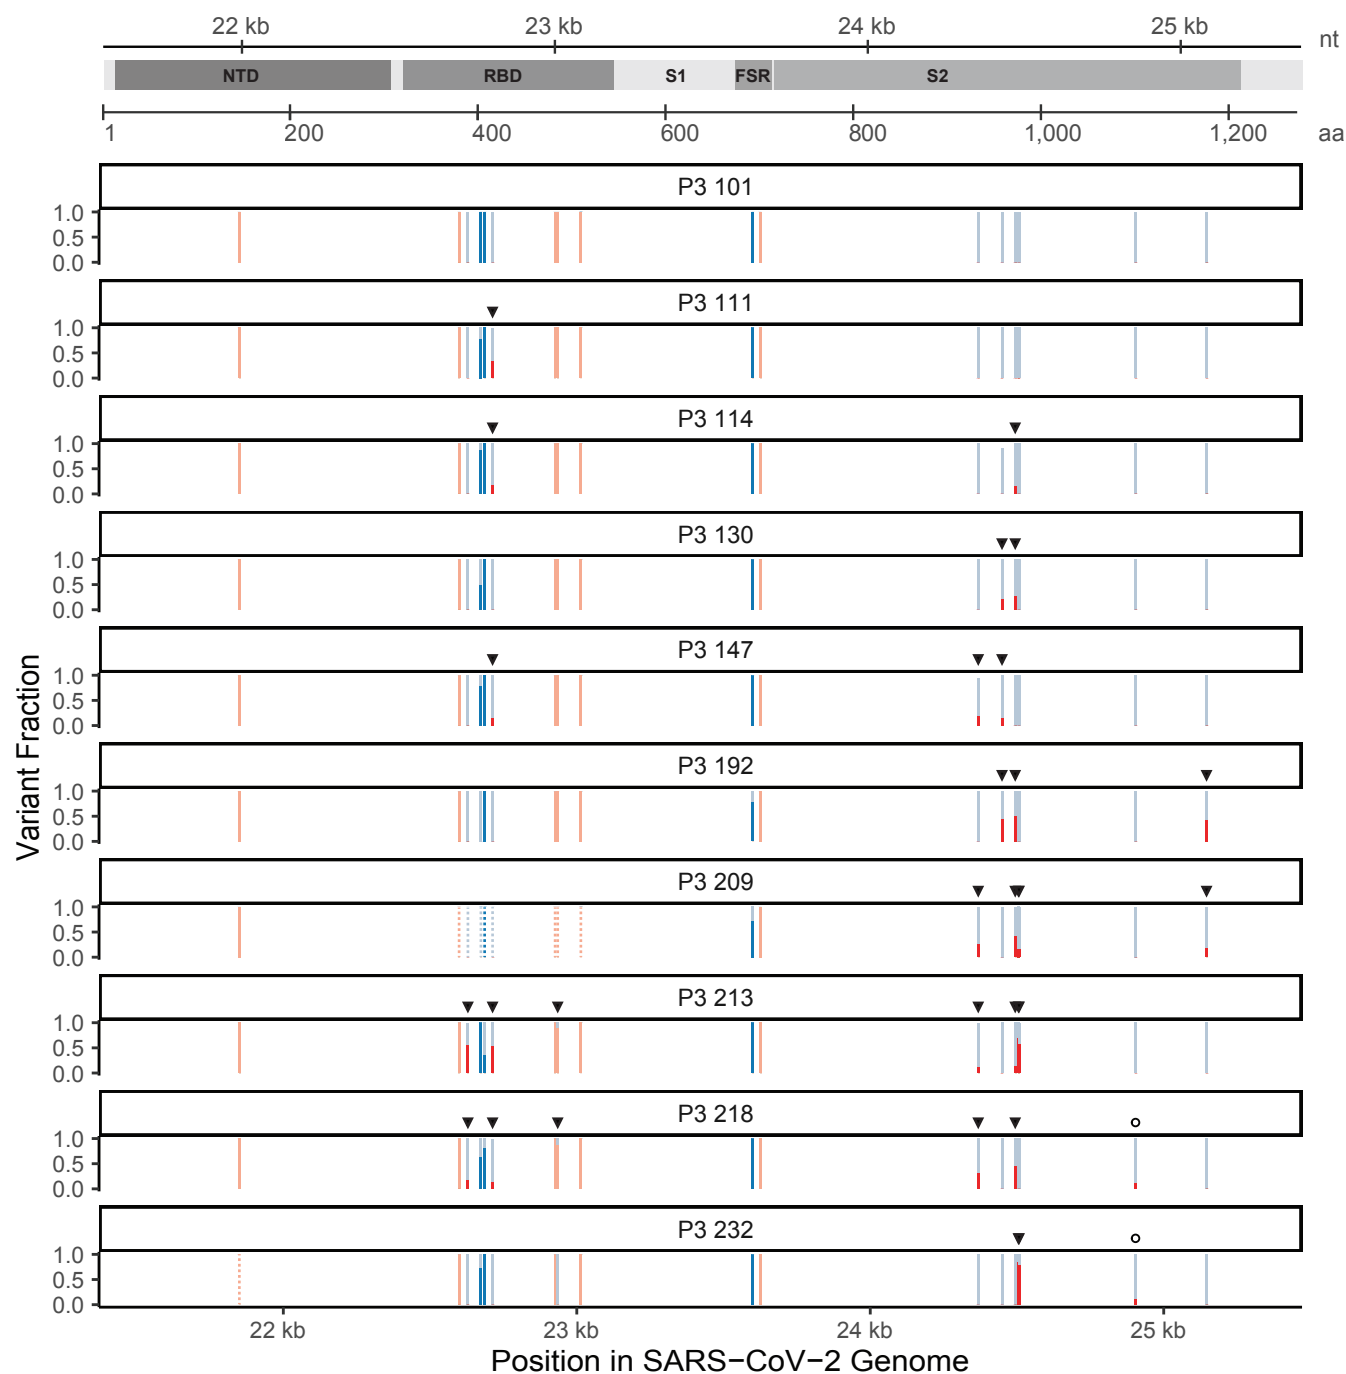

#### SNV

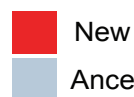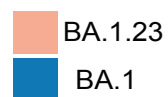

⋯ < 100X coverage

#### Minor SNV type

▼ Nonsynonymous

○ Synonymous
